# Supplementary material
Source: publisher figshare collection journal article supplement (https://gsapubs.figshare.com/articles/dataset/_/12534290)
Supplement: Supplementary file 1 [file 1]

GSA Data Repository 2016328

# The cause of Late Cretaceous cooling: A multi-model/proxy comparison

Clay R. Tabor<sup>1,2</sup>, Christopher J. Poulsen<sup>1</sup>, Daniel J. Lunt<sup>3</sup>, Nan A. Rosenbloom<sup>2</sup>, Bette L. Otto-Bliesner<sup>2</sup>, Paul J. Markwick<sup>4</sup>, Esther C. Brady<sup>2</sup>, Alexander Farnsworth<sup>3</sup>, and Ran Feng<sup>2</sup>

<sup>1</sup> *Department of Earth and Environmental Sciences, University of Michigan, 2534 C. C. Little Building, 1100 North University Ave, Ann Arbor, MI 48109*

<sup>2</sup> *National Center for Atmospheric Research, 1850 Table Mesa Dr, Boulder, CO 80305*

<sup>3</sup> *School of Geographic Sciences, University of Bristol, University Road, Clifton, Bristol BS8 1SS*

<sup>4</sup> *Getech, Kitson House, Elmete Hall, Elmete Lane, Leeds, LS8 2LJ*

## GSA DATA REPOSITORY

## MODEL DESCRIPTIONS

### CCSM4

We use the Community Climate System Model version 4 (CCSM4) maintained at the National Center for Atmospheric Research (NCAR). Our model component-set includes the Community Atmospheric Model version 4 (CAM4), the Community Land Model version 4 with dynamic vegetation (CLM4-DGVM), the Parallel Ocean Project model version 2 (POP2), and the Community Sea Ice model version 4 (CICE4). Additional details on the model components and performance can be found in Gent et al. (2011), and information on the DGVM is

documented in Levis et al. (2004). The ocean and sea ice models run on a rotated poles grid at roughly 1° resolution with 60 vertical ocean levels. The atmosphere and land-surface models run on a finite-volume grid of 1.9×2.5°, and the atmosphere has 28 vertical levels. We run CAM4 with the Bulk Aerosol Model (BAM), a prognostic aerosol model, with aerosol concentrations and types adjusted for the Cretaceous using a method similar to Heavens et al. (2012). Here, aerosol data come from pre-industrial datasets converted into hemispherically symmetric, monthly zonal average aerosols distributions masked independently to land and sea. In addition, we add the land black carbon emissions from 62.5°N/S to all latitudes further poleward to reflect the greater vegetation cover and fire potential at high latitudes during the Cretaceous (Upchurch et al., 1998). We run all simulations for 1500 years with all model components active and synchronously coupled.

## **HadCM3L**

We also use the Hadley Centre Model (HadCM), developed by the UK Met Office. For this study, we implement HadCM3L version 4.5, which contains dynamic atmosphere, ocean, land, and sea ice components on a 2.5×3.75° grid. The ocean and atmosphere have 19 and 20 vertical levels, respectively. Description of the similar HadCM3 model is documented in Gordon et al. (Gordon et al., 2000). We couple HadCM3L with the Top-down Representation of Interactive Foliage and Flora Including Dynamics (TRIFFID) model with the land surface scheme MOSES 2.1 to simulate dynamic vegetation (Cox, 2001). We run the HadCM3 experiments in 4 phases:

1. 50 years with 280 ppm CO<sub>2</sub> and bare-ground

2. 319 years of either 560 or 1120 ppm CO<sub>2</sub> with TRIFFID turned on
3. 53 years with the addition of prescribed lakes
4. 1000 years with barotropic ocean flow enabled to allow non-zero vertically integrated ocean flow

For additional details on HadCM3L initialization and spin-up see Lunt et al. (2015).

## **MODELS SETUP**

Simulations use the paleogeographic reconstructions of Gedge Plc. Following model standard practices and for improved stability, we apply model specific smoothing to the topography. For both models, we adjust total TSI for the Cenomanian (CEN) and Maastrichtian (MAA) based on the equation of Gough (1981). We prescribe CO<sub>2</sub> concentrations as either 4x (1120 ppm) or 2x preindustrial (560 ppm). All other GHG concentrations are set to preindustrial values of 790 ppb for CH<sub>4</sub>, 275 ppb for N<sub>2</sub>O, and no CFCs. The orbit configuration is set to present-day. Vegetation plant functional types are model defaults; we make no adjustments for the Cretaceous. All simulations run long enough for the upper ocean to reach near-equilibrium; however, the deep ocean continues to adjust. As a result, we focus only on surface conditions.

## **ENERGY BALANCE CALCULATIONS**

We use the zonal mean energy balance decomposition method of Heinemann (2009), which was subsequently adopted and modified by Lunt et al. (2012), and Hill et al. (2014), to explore the mechanisms responsible for surface temperature change in the Late Cretaceous with changes in paleogeography and CO<sub>2</sub>. This method assumes incoming shortwave balances with outgoing longwave and that local imbalances are due to changes heat convergence, using the

following relationship:

$$\frac{S_0}{4}(1 - \alpha) + H = \varepsilon \sigma T^4 . (1)$$

Here,  $S_0$  is TSI,  $\alpha$  is albedo,  $H$  is meridional heat convergence,  $\varepsilon$  is emissivity,  $\sigma$  ( $5.67 \times 10^{-8} \text{ Wm}^{-2}\text{K}^{-4}$ ) is the Stefan-Boltzmann constant, and  $T$  is surface temperature. With the exception of  $\sigma$ , values in equation (1) come from zonal averages of Earth system model outputs. We can rewrite equation (1) with respect to surface temperature as:

$$T = \left( \frac{1}{\varepsilon \sigma} \left( \frac{S_0}{4}(1 - \alpha) + H \right) \right)^{0.25} \equiv E(\varepsilon, \alpha, H) . (2)$$

By substituting variables from different simulations and differencing them, we can deconstruct the various contributions to the change in surface temperature. We illustrate this below:

$$\Delta T_{emm} = E(\varepsilon, \alpha, H) - E(\varepsilon', \alpha, H) . (3)$$

$$\Delta T_{alb} = E(\varepsilon, \alpha, H) - E(\varepsilon, \alpha', H) . (4)$$

$$\Delta T_{tran} = E(\varepsilon, \alpha, H) - E(\varepsilon, \alpha, H') . (5)$$

where  $\Delta T_{emm}$ ,  $\Delta T_{alb}$ , and  $\Delta T_{tran}$  are contributions from emissivity, albedo, and heat convergence to surface temperature change, and primes represent the zonal averages from the simulations being compared. The combination of surface temperature changes due to emissivity, albedo, and heat convergence sum to approximate the total surface temperature response:

$$\Delta T_{total} \cong \Delta T_{emm} + \Delta T_{alb} + \Delta T_{tran} . (6)$$

This technique can be used to further decompose the climate contributions to surface temperature.

## PROXY DATA



As mentioned in the main text, SST proxy values represent location and age averages. Method uncertainties only accounts for calibration uncertainties. We apply these uncertainties to every averaged data point. The range in values from a particular age and site are often significantly greater than the calibration uncertainties. Therefore, uncertainties represent minimum estimates.

Point locations are consistently rotated back in time from their present-day sampling locations to the CEN and MAA using the plate reconstructions from Getech Plc. Occasionally, the coarse model resolutions result in marine proxy paleo-locations over land instead of water. In these situations, we select the nearest model ocean location to represent the SST value.

To create more representative latitudinal SST gradients, Gaussian fits of the proxies include an adjustment for the deviation of the SSTs from the zonal mean based on model-simulated longitudinal heterogeneity. For example, if an equatorial proxy location has a model simulated SST of 30°C and a model zonal mean equatorial SST of 35°C, then 5°C are added to the proxy value so that it is in better agreement with the zonal average. This technique assumes that model longitudinal variability is robust regardless of mean SSTs.

We investigate the statistical similarity between the temperature gradients of our CEN and MAA datasets using an F-test. An F-test determines if the variance of multiple datasets are statistically different from each other. To standardize the data, we first remove the global means of the Gaussian fitting procedure (Fig. 2d). Then, we apply an F-test to test the hypothesis that the spread of residual SSTs between the CEN and MAA are statistically distinct. Our results produce a p-value equal to 0.39, which suggests that SST variations, except for the means

between datasets, are not robust.

## **Seawater $\delta^{18}\text{O}$**

We assume a mean  $\delta^{18}\text{O}_{\text{sw}}$  of  $-1^0_{\text{00}}$  VSMOW, based on the assumption of an ice-free world (Shackleton and Kennett, 1975). This assumption is widely used in Cretaceous SST reconstructions (e.g. Huber et al., 2002; Friedrich et al., 2012); however, debate remains about the potential for glaciation in the Late Cretaceous (e.g. Miller et al., 2005). A significant increase in land-ice would require less cooling in the MAA from  $\delta^{18}\text{O}$  records but is not considered further in this study.

$\delta^{18}\text{O}_{\text{sw}}$  has significant regional variability in both the modern and Late Cretaceous (Zhou et al., 2008). To account for this variability, we use zonal average salinity from the model outputs with the present-day salinity/ $\delta^{18}\text{O}_{\text{sw}}$  relationship of Broecker (1989). This simple linear relationship follows:

$$\delta^{18}\text{O}_{\text{w}} = 0.5(PSU) - 17.12 . (7)$$

where *PSU* stands for positive salinity units. In our simulations, mean ocean salinity starts at 35 PSU, which is equivalent to present-day. While not perfect, we prefer this relationship to the commonly employed present-day latitudinal  $\delta^{18}\text{O}_{\text{sw}}$  correction by Zachos et al. (1994), because it indirectly accounts for precipitation and evaporation, and does not make present-day assumptions about the latitudinal distribution of  $\delta^{18}\text{O}_{\text{sw}}$  (Poulsen et al., 1999). Still, this technique is inferior to model experiments that include water isotope tracking (e.g. Zhou et al., 2008).

## **Planktonic Foraminifera**

We calculate SSTs from  $\delta^{18}\text{O}$  measurements of planktonic foraminifera using the calibration of Erez and Luz (1983) and a conversion to VSMOW of  $-0.22\text{‰}$  (Bemis et al., 1998). This calibration has been widely used for foraminifera temperature reconstructions and proven accurate for a wide range of temperatures. Temperatures are calculated using the polynomial:

$$T(^{\circ}\text{C}) = 16.998 - 4.52[\delta^{18}\text{O}_c - \delta^{18}\text{O}_{sw}] + 0.028[\delta^{18}\text{O}_c - \delta^{18}\text{O}_{sw}]^2 . \quad (8)$$

where  $\delta^{18}\text{O}_c$  is the  $\delta^{18}\text{O}$  of sample calcite.

Diagenetic alteration is a potential issue for foraminifera, causing them to pickup post-depositional temperature signals from the ocean floor (e.g. Pearson et al., 2001; Norris et al., 2002). It is likely that some of the foraminifera presented in this study suffer from such alteration given the sample descriptions, relatively cool tropical SSTs, and disagreement with other SST proxy values. However, given the paucity of records and uncertainty in other included proxy techniques such as  $\text{TEX}_{86}$  (e.g. Taylor et al., 2013), we opt to include all planktonic foraminifera data. For comparison, we include zonal SST reconstructions without foraminifera as well (Fig. DR8, DR9, DR10). Even though removal of foraminifera leads to warmer tropical SST reconstructions, it does not significantly change the magnitude of cooling from the CEN to the Maa, which is the main focus of this study. We assign an uncertainty of  $\pm 2.9^{\circ}\text{C}$  for planktonic foraminifera based on Holocene core-top data from Crowley and Zachos (Crowley and Zachos, 2000) and to be consistent with the work of Upchurch (2015).

#### **Shells and Others**

We use the  $\delta^{18}\text{O}$  to temperature conversion of Anderson and Arthur (1983) for both

aragonite and calcite of shells of mollusks, bivalves, brachiopods, and belemnite rostra based on its prevalent use in the proxy source literature (Grossman, 2012). The equation is:

$$T(^{\circ}C) = 16.4 - 4.14(\delta^{18}O_{c/a} - \delta^{18}O_{sw}) + 0.13(\delta^{18}O_{c/a} - \delta^{18}O_{sw})^2 . (9)$$

where  $\delta^{18}O_{c/a}$  is the  $\delta^{18}O$  of sample calcite or aragonite. Like foraminifera, shells are prone to alteration (Steuber et al., 1999). We include all records here for completeness. We also show comparisons with shell SST proxies omitted (Fig. DR8, DR9, DR10). We apply an uncertainty of  $\pm 1.6$  based on  $1\sigma$  of a mollusk calibration by Grossman and Ku (1986) as in Upchurch et al. (2015).

#### **Tooth Enamel $\delta^{18}O$**

Our SST proxy compilation includes phosphate  $\delta^{18}O$  records from fish tooth enamel, most of which were originally compiled by Puc  at et al. (2007). These records are considered more resistant to diagenetic alteration than foraminifera or shells, and were previously used by Puc  at et al. (2007) to argue for a near-modern latitudinal SST gradient in the Cretaceous, in contrast to reconstructions from foraminifera that suggested a shallower latitudinal SST gradient (e.g. Huber et al., 2002). Recently, there have been several recalibrations of the phosphate  $\delta^{18}O$  temperature relationship. Here, we use the most recent calibration by Lecuyer et al. (2013):

$$T(^{\circ}C) = 117.4 - 4.5(\delta^{18}O_{PO_4} - \delta^{18}O_{sw}) . (10)$$

where  $\delta^{18}O_{PO_4}$  is the  $\delta^{18}O$  of sample phosphate. This calibration results in SSTs that are several degrees warmer than the calibration by Puc  at et al. (2007) and several degrees cooler than the recent calibration by Puc  at et al. (2010). However, the magnitude of offset between calibrations remains quite similar over the range of  $\delta^{18}O_{PO_4}$  values. Therefore, while the absolute temperature

reconstructions differ depending on the chosen calibration, the difference between the CEN and MAA records is small. In addition, the calibration of Lecuyer et al. (2013) benefits from the smallest uncertainty of  $\pm 1.2^{\circ}\text{C}$ , which we apply to all tooth enamel SST values.

## **TEX<sub>86</sub>**

TEX<sub>86</sub> is a relatively new SST proxy method based on the ratio of different glycerol dialkyl glycerol tetraethers (GDGTs) with 86 carbons, which comprise membrane lipids in marine Crenarchaeota (Schouten et al., 2002). It has the benefit of not relying on  $\delta^{18}\text{O}_{\text{sw}}$  assumptions. Here, we use the calibration of Kim et al. (2010) TEX<sub>86</sub><sup>H</sup>, which provides the smallest error in warm climate conditions. The equation is:

$$T(^{\circ}\text{C}) = 68.4 \log(\text{TEX}_{86}) + 38.6 . \quad (11)$$

Modern calibration by Kim et al. (2010) show an uncertainty of  $\pm 2.5^{\circ}\text{C}$ , which we use in our model/proxy comparison.

We include the high-latitude MAA TEX<sub>86</sub><sup>H</sup> SST value from Jenkyns et al. (2004) in our tables and plots for reference but do not include it in our analyses. We find, like several former studies (Davies et al., 2009; Spicer and Herman, 2010; Upchurch et al., 2015), that this value represents an extreme outlier from other proxy data and model results. Inclusion of this data point significantly skews our results, because it is the only available Arctic MAA SST value. Based on our other findings, it requires roughly  $10^{\circ}\text{C}$  warming from  $50^{\circ}\text{N}$  to  $80^{\circ}\text{N}$ , for which we have no physical basis.

## **GSA DATA REPOSITORY FIGURE CAPTIONS**

Figure DR1. Getech Plc CEN and MAA paleogeography with marine proxy locations.

Figure DR2: Individual model simulated Late Cretaceous mean annual surface temperatures and temperature responses to changes in paleogeography and CO<sub>2</sub> concentration. Row 1 shows CCSM4 mean annual surface temperatures from CEN4x (A), MAA4x (B), and MAA2x (C). Row 2 shows HadCM3L mean annual surface temperatures from CEN4x (D), MAA4x (E), and MAA2x (F). Row 3 shows CCSM4 mean annual surface temperature differences between CEN4x and MAA4x (G), MAA4x and MAA2x (H), and CEN4x and MAA2x (I). Row 4 shows HadCM3L mean annual surface temperature differences between CEN4x and MAA4x (J), MAA4x and MAA2x (K), and CEN4x and MAA2x (L). The large-scale surface temperature patterns are quite similar for both models.

Figure DR3. Late Cretaceous mean annual total cloud cover and anomalies. Column 1 shows the model total cloud cover from A) CEN4x, B) MAA4x, and C) MAA2x. Column 2 shows the difference in total cloud cover between D) CEN4x and MAA4x, E) MAA4x and MAA2x, and F) CEN4x and MAA2x. Column 3 shows the total cloud cover anomalies between CCSM4 and HadCM3L for G) CEN4x, H) MAA4x, and I) MAA2x. Clouds remain one of the largest uncertainties in climate models. Both models show similar cloud patterns for all model configurations. However, the range of cloud cover between regions is more pronounced in HadCM3L than CCSM4. The configuration of the CCSM4 aerosols for paleoclimate might be partly responsible for the discrepancies in cloud magnitude.

Figure DR4. Late Cretaceous mean annual surface albedo and anomalies. Column 1 shows the model surface albedo from A) CEN4x, B) MAA4x, and C) MAA2x. Column 2 shows the difference in surface albedo between D) CEN4x and MAA4x, E) MAA4x and MAA2x, and F)

209 CEN4x and MAA2x. Column 3 shows the surface albedo anomalies between CCSM4 and  
 210 HadCM3L for G) CEN4x, H) MAA4x, and I) MAA2x. In the high-latitudes, CCSM4 simulates  
 211 higher surface albedos than HadCM3L due to differences in sea ice cover and vegetation.  
 212 CCSM4 tends to produce more sea in the Arctic than HadCM3L, which leads to greater  
 213 shortwave reflection, especially in the spring and fall. CCSM4 also grows shorter, less dense  
 214 vegetation than HadCM3L in the polar regions. A lower vegetation and reduced canopy allows  
 215 for more snow cover of vegetation, which raises the albedo. Tall, dense Antarctic vegetation  
 216 suggested by paleobotanical reconstructions is not simulated in CCSM4 (e.g. Upchurch et al.,  
 217 1998). Modification of the vegetation model will be an important step in our future work, as  
 218 some research shows vegetation can help remedy model/proxy LST discrepancies (e.g. Otto-  
 219 Bliesner and Upchurch, 1998; Zhou et al., 2012).  
 220 Figure DR5. Zonal mean annual SST responses to changing topography and decreasing CO<sub>2</sub> for  
 221 both CCSM4 and HadCM3L models. Comparison of CCSM4 and HadCM3L outputs highlight  
 222 the similarities in surface temperature response.  
 223 Figure DR6. Decomposition of the simulated changes in zonal mean surface temperature into  
 224 contributions from heat convergence (red), emissivity (green), albedo (blue), and TSI (yellow)  
 225 for A) CCSM4 and B) HadCM3L changes in geography, C) CCSM4 and D) HadCM3L changes  
 226 in CO<sub>2</sub>, and E) CCSM4 and F) HadCM3L changes in both geography and CO<sub>2</sub>. See Data  
 227 Repository for details on energy balance calculations.  
 228 Figure DR7. Seasonal sea ice exists in all 4x PI CO<sub>2</sub> simulations in agreement with some proxies  
 229 that find evidence for Arctic sea ice during peak Cretaceous warmth (Davies et al., 2009). The

Arctic experiences an increase in sea ice concentration from the CEN to MAA because the Arctic becomes more restricted in the Maa. With a reduction in CO<sub>2</sub>, a significant amount of perennial sea ice forms in the Arctic while Antarctic sea ice remains mostly seasonal. This contrast in sea ice between hemispheres is similar to present-day where the restricted Arctic promotes retention of sea ice, and the open ocean Antarctic allows the equator drift and wasting of sea ice.

In all experiments, CCSM4 produces greater Arctic sea ice cover and less Antarctic sea ice cover than HadCM3L. This contrast relates to the differences in open ocean SSTs between models. In general, CCSM4 has greater ocean overturning in the high Southern latitudes, which promotes transports of warm equatorial water poleward and inhibits sea ice formation. In contrast, there is less deep-water formation in the high Northern latitudes in either model.

Further, the Late Cretaceous Arctic is quite restricted from the greater ocean, especially in the Maa, which prevents warm open ocean waters from having a large effect.

Figure DR8. Latitudinal temperature gradient reconstructions from the CEN with the systematic removal of SST proxy reconstruction data from individual methods. Simulated CEN4x zonal average SSTs with all CEN proxies SST except A) foraminifera, B) fish tooth enamel, C) shells and related structures, and D) TEX<sub>86</sub>. Removal of foraminifera leads to a significantly warmer equator and steeper equator-to-pole temperature gradient. This gradient is steeper than model simulated SSTs. It appears likely that some foraminifera are not recording a pure SST signal.

Figure DR9. Latitudinal temperature gradient reconstructions from the MAA with the systematic removal of SST proxy reconstruction data from individual methods. Simulated MAA4x zonal



average SSTs with all MAA proxies SST except A) foraminifera, B) fish tooth enamel, C) shells and related structures, and D) TEX<sub>86</sub>. Like for the Cen, removal of foraminifera leads to a significantly warmer equator and steeper equator-to-pole temperature gradient.

Figure DR10. Identical to figure S7 except with simulated MAA2x data plotted.

Figure DR11. SST model/proxy discrepancies by latitude. A) Differences between CEN proxies and CEN4x simulations. B) Differences between MAA proxies and MAA4x simulations. C) Differences between MAA proxies and MAA2x simulations. In general, the CEN4x simulations have a cold bias while the MAA4x simulations have a warm bias. The MAA2x simulations are in better agreement with SST proxies. A model warm bias remains in the equatorial region in the MAA2x, but this might be a result of diagenetic alteration of planktonic foramina. While beyond the scope of this work, calibration choices also impact model/proxy agreement. For example, the warmer fish tooth enamel calibration of Puc  at et al. (2010) might result in a better agreement between models and proxies for the MAA2x simulations.

#### **GSA DATA REPOSITORY REFERENCES CITED**

- Abramovich, S., Keller, G., St  ben, D., and Berner, Z., 2003, Characterization of late Campanian and Maastrichtian planktonic foraminiferal depth habitats and vital activities based on stable isotopes: *Palaeogeography Palaeoclimatology Palaeoecology*, v. 202, no. 1-2, p. 1–29, doi: 10.1016/S0031-0182(03)00572-8.
- Alsenz, H., Regnery, J., Ashckenazi-Polivoda, S., Meilijson, A., Ron-Yankovich, L., Illner, P., Abramovich, S., Almogi-Labin, A., Feinstein, S., Berner, Z., and P  ttmann, W., 2013, Characterization of late Campanian and Maastrichtian planktonic foraminiferal depth

272 habitats and vital activities based on stable isotopes: *Palaeogeography Palaeoclimatology*  
 273 *Palaeoecology*, v. 392, no. C, p. 350–358, doi: 10.1016/j.palaeo.2013.09.013.  
 274 Anderson, T.F., Arthur, M.A., 1983: Stable isotopes of oxygen and carbon and their application  
 275 to sedimentologic and paleoenvironmental problems: *Stable Isotopes in Sedimentary*  
 276 *Geology*, v. 1, p. 1-151.  
 277 Ando, A., Nakano, T., Kaiho, K., and Kobayashi, T., 2009, Onset of seawater  $^{87}\text{Sr}/^{86}\text{Sr}$   
 278 excursion prior to Cenomanian–Turonian Oceanic Anoxic Event 2? New Late Cretaceous  
 279 strontium isotope curve from the central Pacific Ocean: *Journal of Foraminiferal*  
 280 *Research*, v39, no 4, p. 322-334.  
 281 Barrera, E., and Savin, S.M., 1999, Evolution of late Campanian-Maastrichtian marine climates  
 282 and oceans: *Geological Society of American-Special Papers*, v. 332.  
 283 Bemis, E.B., Spero, H.J., Bijma, J., and Lea, D.W., 1998, Reevaluation of the oxygen isotopic  
 284 composition of planktonic foraminifera: Experimental results and revised  
 285 paleotemperature equations: *Paleoceanography*, v. 13, no. 2, p. 150-160.  
 286 Bice, K.L., Birgel, D., Meyers, P.A., Dahl, K.A., Hinrichs, K.U., and Norris, R.D., 2006, A  
 287 multiple proxy and model study of Cretaceous upper ocean temperatures and atmospheric  
 288  $\text{CO}_2$  concentrations: *Paleoceanography*, v. 21, no. 2, doi: 10.1029/2005PA001203.  
 289 Broecker, W.S., 1989, The Salinity Contrast Between the Atlantic and Pacific Oceans During  
 290 Glacial Time: *Paleoceanography*, v. 4, no. 2, p. 207–212, doi:  
 291 10.1029/PA004i002p00207.  
 292 Carpenter, S.J., Erickson, J.M., and Holland, F.D., 2003, Migration of a Late Cretaceous fish:

293 Nature, v. 423, no. 6935, p. 70–74, doi: 10.1038/nature01588.

294 Clarke, L.J., and Jenkyns, H.C., 1999, New oxygen isotope evidence for long-term Cretaceous  
 295 climatic change in the Southern Hemisphere: *Geology*, v. 27, no. 8, p. 699–702.

296 Crowley, T.J., and Zachos, J.C., 2000, Comparison of zonal temperature profiles for past warm  
 297 time periods: *Warm Climates in Earth History*, p. 50-76.

298 Cox, P. M., Betts, R. A., Jones, C. D., Spall, S. A., and Totterdell, I. J.: Modelling vegetation and  
 299 the carbon cycle as interactive elements of the climate system, in: *Meteorology at the  
 300 Millennium*, edited by Pearce, R., pp. 259–279, Academic Press, 2001.

301 Damste, J.S.S., van Bentum, E.C., Reichert, G.-J., Pross, J., and Schouten, S., 2010, Earth and  
 302 Planetary Science Letters: *Earth and Planetary Science Letters*, v. 293, no. 1-2, p. 97–  
 303 103, doi: 10.1016/j.epsl.2010.02.027.

304 Davies, A., Kemp, A.E.S., and Pike, J., 2009, Late Cretaceous seasonal ocean variability from  
 305 the Arctic: *Nature*, v. 460, no. 7252, p. 254–U118, doi: 10.1038/nature08141.

306 D'Hondt, S., and Lindinger, M., 1994, A stable isotopic record of the Maastrichtian ocean-  
 307 climate system: South Atlantic DSDP Site 528: *Palaeogeography*, v. 112, p. 363-378.

308 Ditchfield, P.W., Marshall, J.D., and Pirrie, D., 1994, High latitude palaeotemperature variation:  
 309 New data from the Thithonian to Eocene of James Ross Island, Antarctica:  
 310 *Palaeogeography*, v. 107, p. 79-101.

311 El-Shazly, S., Košťák, M., Kloučková, B., Saber, S.G., Felieh Salama, Y., Mazuch, M., and Žák,  
 312 K., 2011, Carbon and oxygen stable isotopes of selected Cenomanian and Turonian  
 313 rudists from Egypt and Czech Republic, and a note on changes in rudist diversity:

314 Bulletin of Geosciences,, p. 209–226, doi: 10.3140/bull.geosci.1151.  
 315 Erez, J., and Luz, B., 1983, Experimental paleotemperature equation for planktonic foraminifera:  
 316 Geochimica Et Cosmochimica Acta, v. 47, p. 1025-1031.  
 317 Frank, T.D., and Arthur, M.A., 1999, Tectonic forcings of Maastrichtian ocean-climate  
 318 evolution: Paleoceanography, v. 14, no. 2, p. 103–117.  
 319 Friedrich, O., Herrle, J.O., Köbller, P., and Hemleben, C., 2004, Early Maastrichtian stable  
 320 isotopes: changing deep water sources in the North Atlantic?: Palaeogeography  
 321 Palaeoclimatology Palaeoecology, v. 211, no. 1-2, p. 171–184, doi:  
 322 10.1016/j.palaeo.2004.05.004.  
 323 Friedrich, O., Erbacher, J., Moriya, K., Wilson, P.A., and Kuhnert, H., 2008, Warm saline  
 324 intermediate waters in the Cretaceous tropical Atlantic Ocean: Nature Geoscience, v. 1,  
 325 no. 7, p. 453–457, doi: 10.1038/ngeo217.  
 326 Friedrich, O., Herrle, J.O., Wilson, P.A., Cooper, M.J., Erbacher, J., and Hemleben, C., 2009,  
 327 Early Maastrichtian carbon cycle perturbation and cooling event: Implications from the  
 328 South Atlantic Ocean: Paleoceanography, v. 24, no. 2, p. n/a–n/a, doi:  
 329 10.1029/2008PA001654.  
 330 Forster, A., Schouten, S., Baas, M., and Damste, J.S.S., 2007a, Mid-Cretaceous (Albian-  
 331 Santonian) sea surface temperature record of the tropical Atlantic Ocean: Geology, v. 35,  
 332 no. 10, p. 919–922, doi: 10.1130/G23874A.1.  
 333 Forster, A., Schouten, S., Moriya, K., Wilson, P.A., and Sinninghe Damsté, J.S., 2007b, Tropical  
 334 warming and intermittent cooling during the Cenomanian/Turonian oceanic anoxic event

335 2: Sea surface temperature records from the equatorial Atlantic: *Paleoceanography*, v. 22,  
336 no. 1, doi: 10.1029/2006PA001349.

337 Gent, P.R., Danabasoglu, G., Donner, L.J., Holland, M.M., Hunke, E.C., Jayne, S.R., Lawrence,  
338 D.M., Neale, R.B., Rasch, P.J., Vertenstein, M., Worley, P.H., Yang, Z.-L., and Zhang,  
339 M., 2011, The Community Climate System Model Version 4: *Journal of Climate*, v. 24,  
340 no. 19, p. 4973–4991, doi: 10.1175/2011JCLI4083.1.

341 Gordon, C., Cooper, C., Senior, C.A., Banks, H., and Gregory, J.M., 2000, The simulation of  
342 SST, sea ice extents and ocean heat transports in a version of the Hadley Centre coupled  
343 model without flux adjustments: *Climate Dynamics*, v. 16, p. 147-168.

344 Gough, D.O., 1981, Solar interior structure and luminosity variations: *Physics of Solar*  
345 *Variations*, v. 74, p. 21-34.

346 Grossman, E.L., and Ku, T.L., 1986, Oxygen and carbon isotope fractionation in biogenic  
347 aragonite: temperature effects: *Chemical Geology: Isotope Geoscience section*, v. 59; p.  
348 59-74.

349 Grossman, E.L., 2012, Reconstructing Earth’s deep-time climate-the state of the art in 2012:  
350 *Paleontological Society Papers*, v. 18; p. 39-67.

351 Gustafsson, M., Holbourn, A., and Kuhnt, W., 2003, Changes in Northeast Atlantic temperature  
352 and carbon flux during the Cenomanian/Turonian paleoceanographic event: the Goban  
353 Spur stable isotope record: *Palaeogeography Palaeoclimatology Palaeoecology*, v. 201,  
354 no. 1-2, p. 51–66, doi: 10.1016/S0031-0182(03)00509-1.

355 Heavens, N.G., Shields, C.A., and Mahowald, N.M., 2012, A paleogeographic approach to

356 aerosol prescription in simulations of deep time climate: *Journal of Advances in*  
 357 *Modeling Earth Systems*, v. 4, no. 4, p. n/a–n/a, doi: 10.1029/2012MS000166.  
 358 Heinemann, M., Jungclauss, J.H., and Marotzke, J., 2009, Warm Paleocene/Eocene climate as  
 359 simulated in ECHAM5/MPI-OM: *Climate of the Past*, v. 5, p. 785-802.  
 360 Henderson, R.A., and Price, G.D., 2012, Paleoenvironment and paleoecology from oxygen and  
 361 carbon isotopes of subtropical mollusks from the Late Cretaceous (Cenomanian) of  
 362 Bathurst Island, Australia: *Palaaios*, v. 27, no. 9, p. 617–626, doi: 10.2110/palo.2011.p11-  
 363 120r.  
 364 Hill, D.J., Haywood, A.M., Lunt, D.J., Hunter, S.J., Bragg, F.J., Contoux, C., Stepanek, C., Sohl,  
 365 L., Rosenbloom, N.A., Chan, W.L., Kamae, Y., Zhang, Z., Abe-Ouchi, A., Chandler,  
 366 M.A., et al., 2014, Evaluating the dominant components of warming in Pliocene climate  
 367 simulations: *Climate of the Past*, v. 10, no. 1, p. 79–90, doi: 10.5194/cp-10-79-2014.  
 368 Huber, B.T., Hodell, D.A., Hamilton, C.P., 1995, Middle–Late Cretaceous climate of the  
 369 southern high latitudes: stable isotopic evidence for minimal equator-to-pole thermal  
 370 gradients: *Geological Society of America*, v. 107, no. 10, p. 1164-1191.  
 371 Jenkyns, H.C., Forster, A., Schouten, S., and Damste, J., 2004, High temperatures in the Late  
 372 Cretaceous Arctic Ocean: *Nature*, v. 432, no. 7019, p. 888–892, doi:  
 373 10.1038/nature03143.  
 374 Kim, J.H., van der Meer, J., Schouten, S., Helmke, P., Willmott, V., Sangiorgi, F., Koç, N.,  
 375 Hopmans, E.C., and Damste, J.S.S., 2010, New indices and calibrations derived from the  
 376 distribution of crenarchaeal isoprenoid tetraether lipids: Implications for past sea surface

377 temperature reconstructions: *Geochimica Et Cosmochimica Acta*, v. 74, no. 16, p. 4639–  
378 4654, doi: 10.1016/j.gca.2010.05.027.

379 Kolodny, Y., and Raab, M., 1988, Oxygen isotopes in phosphatic fish remains from Israel:  
380 paleothermometry of tropical Cretaceous and Tertiary shelf waters: *Palaeogeography*, v.  
381 64, p. 59-67.

382 Kolodny, Y., and Luz, B., 1991, Oxygen isotopes in phosphates of fossil fish—Devonian to  
383 Recent: *The Geochemical Society*, p. 105-119.

384 Lécuyer, C., Amiot, R., Touzeau, A., and Trotter, J., 2013, Calibration of the phosphate d18O  
385 thermometer with carbonate-water oxygen isotope fractionation equations: *Chemical*  
386 *Geology*, v. 347, no. C, p. 217–226, doi: 10.1016/j.chemgeo.2013.03.008.

387 Lécuyer, C., Grandjean, P., O'Neil, J.R., and Cappetta, H., 1993, Thermal excursions in the  
388 ocean at the Cretaceous—Tertiary boundary (northern Morocco):  $\delta^{18}\text{O}$  record of  
389 phosphatic fish debris: *Palaeogeography*, v. 105, p. 235-243.

390 Levis, S., Bonan, G.B., Vertenstein, M., and Oleson, K.W., 2004, The Community Land Model's  
391 Dynamic Global Vegetation Model (CLM-DGVM): Technical Description and User's  
392 Guide: National Center For Atmospheric Research.

393 Li, L.Q., and Keller, G., 1998, Maastrichtian climate, productivity and faunal turnovers in  
394 planktic foraminifera in south Atlantic DSDP sites 525A and 21: *Marine*  
395 *Micropaleontology*, v. 33, no. 1-2, p. 55–86.

396 Li, L., and Keller, G., 1999, Variability in Late Cretaceous climate and deep waters: evidence  
397 from stable isotopes: *Marine Geology*, v. 161, p. 171-190.

398 Linnert, C., Robinson, S.A., Lees, J.A., Bown, P.R., Guez, I.P.E.R.-R.I., Petrizzo, M.R., Falzoni,  
 399 F., Littler, K., Arz, J.E.A., and Russell, E.E., 2014, Evidence for global cooling in the  
 400 Late Cretaceous: *Nature Communications*, v. 5, p. 1–7, doi: 10.1038/ncomms5194.  
 401 Lunt, D.J., Dunkley Jones, T., Heinemann, M., Huber, M., LeGrande, A., Winguth, A., Loptson,  
 402 C., Marotzke, J., Roberts, C.D., Tindall, J., Valdes, P., and Winguth, C., 2012, A model–  
 403 data comparison for a multi-model ensemble of early Eocene atmosphere–ocean  
 404 simulations: *EoMIP: Climate of the Past*, v. 8, no. 5, p. 1717–1736, doi: 10.5194/cp-8-  
 405 1717-2012-supplement.  
 406 Lunt, D. J., Farnsworth, A., Loptson, C., Foster, G. L., Markwick, P., O'Brien, C. L., Pancost, R.  
 407 D., Robinson, S. A., and Wrobel, N., 2016, Palaeogeographic controls on climate and  
 408 proxy interpretation, *Clim. Past.*, 11, 5683-5725, doi:10.5194/cp-12-1181-2016.  
 409 Macleod, K.G., Huber, B.T., and Isaza-Londoño, C., 2005, North Atlantic warming during  
 410 global cooling at the end of the Cretaceous: *Geology*, v. 33, no. 6, p. 437, doi:  
 411 10.1130/G21466.1.  
 412 Maestas, Y., MacLeod, K.G., Douglas, R., Self-Trail, J., and Ward, P.D., 2003, Late Cretaceous  
 413 foraminifera, paleoenvironments, and paleoceanography of the Rosario Formation, San  
 414 Antonio del Mar, Baja California, Mexico: *Journal of Foraminiferal Research*, v. 33, no.  
 415 3, p. 179–191.  
 416 Miller, K.G., et al. 2005, The Phanerozoic Record of Global Sea-Level Change: *Science*, v. 310,  
 417 no. 5752, p. 1293–1298, doi: 10.1126/science.1116412.  
 418 Moriya, K., Wilson, P.A., Friedrich, O., Erbacher, J., and Kawahata, H., 2007, Testing for ice



419 sheets during the mid-Cretaceous greenhouse using glassy foraminiferal calcite from the  
 420 mid-Cenomanian tropics on Demerara Rise: *Geology*, v. 35, no. 7, p. 615–618, doi:  
 421 10.1130/G23589A.1.

422 Norris, R.D., and Wilson, P.A., 1998, Low-latitude sea-surface temperatures for the mid-  
 423 Cretaceous and the evolution of planktic foraminifera: *Geology*, v. 26, no. 9, p. 832-826.

424 Norris, R.D., Bice, K.L., Magno, E.A., and Wilson, P.A., 2002, Jiggling the tropical thermostat  
 425 in the Cretaceous hothouse: *Geology*, v. 30, no. 4, p. 299-302.

426 Ounis, A., Kocsis, L., Chaabani, F., and Pfeifer, H.-R., 2008, Rare earth elements and stable  
 427 isotope geochemistry ( $\delta^{13}\text{C}$  and  $\delta^{18}\text{O}$ ) of phosphorite deposits in the Gafsa Basin,  
 428 Tunisia: *Palaeogeography Palaeoclimatology Palaeoecology*, v. 268, no. 1-2, p. 1–18,  
 429 doi: 10.1016/j.palaeo.2008.07.005.

430 Pearson, P.N., Ditchfield, P.W., Singano, J., Harcourt-Brown, K.G., Nicholas, C.J., Olsson, R.K.,  
 431 Shackleton, N.J., and Hall, M.A., 2001, Warm tropical sea surface temperatures in the  
 432 Late Cretaceous and Eocene epochs: *Nature*, v. 413, no. 6855, p. 481–487.

433 Pirrie, D., and Marshall, J.D., 1990, High-paleolatitude late Cretaceous paleotemperatures: new  
 434 data from James Ross Island, Antarctica: *Geology*, v. 18, p. 31-34.

435 Poulsen, C.J., Barron, E.J., Peterson, W.H., and Wilson, P.A., 1999, A reinterpretation of mid-  
 436 Cretaceous shallow marine temperatures through model-data comparison:  
 437 *Paleoceanography*, v. 14, p. 679-697.

438 Price, G.D., Sellwood, B.W., and Corfield, R.M., 1998, Isotopic evidence for palaeotemperatures  
 439 and depth stratification of Middle Cretaceous planktonic foraminifera from the Pacific

440 Ocean: Geological Magazine, v. 135, no. 2, p. 183-191.  
 441 Price, G.D., and Hart, M.B., 2002, Isotopic evidence for Early to mid-Cretaceous ocean  
 442 temperature variability: Marine Micropaleontology, v. 46, p. 45-48.  
 443 Price, G.D., Williamson, T., Henderson, R.A., and Gagan, M.K., 2012, Barremian-Cenomanian  
 444 palaeotemperatures for Australian seas based on new oxygen-isotope data from belemnite  
 445 rostra: Palaeogeography Palaeoclimatology Palaeoecology, v. 358-360, no. C, p. 27–39,  
 446 doi: 10.1016/j.palaeo.2012.07.015.  
 447 Pucéat, E., Joachimski, M.M., Bouilloux, A., Monna, F., Bonin, A., Motreuil, S., Morinière, P.,  
 448 Hénard, S., Mourin, J., Dera, G., and Quesne, D., 2010, Earth and Planetary Science  
 449 Letters: Earth and Planetary Science Letters, v. 298, no. 1-2, p. 135–142, doi:  
 450 10.1016/j.epsl.2010.07.034.  
 451 Pucéat, E., Lécuyer, C., Sheppard, S.M.F., Dromart, G., Reboulet, S., and Grandjean, P., 2003,  
 452 Thermal evolution of Cretaceous Tethyan marine waters inferred from oxygen isotope  
 453 composition of fish tooth enamels: Paleoceanography, v. 18, no. 2, p. n/a–n/a, doi:  
 454 10.1029/2002PA000823.  
 455 Pucéat, E., Lécuyer, C., Donnadieu, Y., Naveau, P., Cappetta, H., Ramstein, G., Huber, B.T., and  
 456 Kriwet, J., 2007, Fish tooth  $\delta^{18}\text{O}$  revising Late Cretaceous meridional upper ocean water  
 457 temperature gradients: Geology, v. 35, no. 2, p. 107, doi: 10.1130/G23103A.1.  
 458 Schönfeld, J., Sirocko, F., and Jørgensen, N.O., 1991, Oxygen isotope composition of Upper  
 459 Cretaceous chalk at Lägerdorf (NW Germany): its original environmental signal and  
 460 palaeotemperature interpretation: Cretaceous Research, v.12, p. 27-46.

461 Sellwood, B.W., Price, G.D., and Valdest, P.J., 1994, Cooler estimates of Cretaceous  
 462 temperatures: *Nature*, v. 370, p. 453-455.

463 Schouten, S., Hopmans, E.C., Schefuss, E., and Damste, J., 2002, Distributional variations in  
 464 marine crenarchaeotal membrane lipids: a new tool for reconstructing ancient sea water  
 465 temperatures?: *Earth and Planetary Science Letters*, v. 204, no. 1-2, p. 265–274.

466 Schouten, S., Hopmans, E.C., Forster, A., van Breugel, Y., Kuypers, M.M.M., and Sinninghe  
 467 Damsté, J.S., 2003, Extremely high sea-surface temperatures at low latitudes during the  
 468 middle Cretaceous as revealed by archaeal membrane lipids: *Geology*, v. 31, no. 12, p.  
 469 1069, doi: 10.1130/G19876.1.

470 Spicer, R.A., and Herman, A.B., 2010, The Late Cretaceous environment of the Arctic: A  
 471 quantitative reassessment based on plant fossils: *Palaeogeography Palaeoclimatology*  
 472 *Palaeoecology*, v. 295, no. 3-4, p. 423–442, doi: 10.1016/j.palaeo.2010.02.025.

473 Steuber, T., Rauch, M., Masse, J.P., Graaf, J., and Malkoč, M., 2005, Low-latitude seasonality of  
 474 Cretaceous temperatures in warm and cold episodes: *Nature*, v. 437, no. 7063, p. 1341–  
 475 1344, doi: 10.1038/nature04096.

476 Taylor, K.W.R., Huber, M., Hollis, C.J., Hernandez-Sanchez, M.T., and Pancost, R.D., 2013,  
 477 Global and Planetary Change: *Global and Planetary Change*, v. 108, no. C, p. 158–174,  
 478 doi: 10.1016/j.gloplacha.2013.06.011.

479 Upchurch, G.R., Otto-Bliesner, B.L., and Scotese, C., 1998, Vegetation–atmosphere interactions  
 480 and their role in global warming during the latest Cretaceous: *Philosophical Transactions*  
 481 *of the Royal Society of London B*, v. 353, p. 97-112.

482 Upchurch, G.R., Jr, Kiehl, J., Shields, C., Scherer, J., and Scotese, C., 2015, Latitudinal  
 483 temperature gradients and high-latitude temperatures during the latest Cretaceous:  
 484 Congruence of geologic data and climate models: *Geology*, v. 43, no. 8, p. 683–686, doi:  
 485 10.1130/G36802.1.

486 Vellekoop, J., Sluijs, A., Smit, J., Schouten, S., Weijers, J.W.H., Sinninghe Damste, J.S., and  
 487 Brinkhuis, H., 2014, Rapid short-term cooling following the Chicxulub impact at the  
 488 Cretaceous-Paleogene boundary: *Proceedings of the National Academy of Sciences*, v.  
 489 111, no. 21, p. 7537–7541, doi: 10.1073/pnas.1319253111.

490 Voigt, S., Wilmsen, M., Mortimore, R.N., and Voigt, T., 2003, Cenomanian palaeotemperatures  
 491 derived from the oxygen isotopic composition of brachiopods and belemnites: evaluation  
 492 of Cretaceous palaeotemperature proxies: *International Journal of Earth Science*. doi:  
 493 10.1007/s00531-003-0315-1.

494 Voigt, S., Gale, A.S., and Flögel, S., 2004, Midlatitude shelf seas in the Cenomanian-Turonian  
 495 greenhouse world: Temperature evolution and North Atlantic circulation:  
 496 *Paleoceanography*, v. 19, no. 4,, doi: 10.1029/2004PA001015.

497 Wilson, P.A., and Opdyke, B.N., 1996, Equatorial sea-surface temperatures for the Maastrichtian  
 498 revealed through remarkable preservation of metastable carbonate: *Geology*, v. 24, no. 6,  
 499 p. 555-558.

500 Zachos, J.C., Stott, L.D., and Lohmann, K.C., 1994, Evolution of early Cenozoic marine  
 501 temperatures: *Paleoceanography*, v. 9, no. 2, p. 353-387.

502 Zakharov, Y.D., Popov, A.M., and Shigeta, Y., 2006, New Maastrichtian oxygen and carbon

503 isotope record: additional evidence for warm low latitudes: *Geosciences Journal*, v. 10,  
504 no. 3, p. 347-367.

505 Zhou, J., Poulsen, C.J., pollard, D., and White, T.S., 2008, Simulation of modern and middle  
506 Cretaceous marine delta O-18 with an ocean-atmosphere general circulation model:  
507 *Paleoceanography*, v. 23, no. 3, doi: 10.1029/2008PA001596.

Cenomanian Paleogeography and Proxy Locations

Fig. DR1

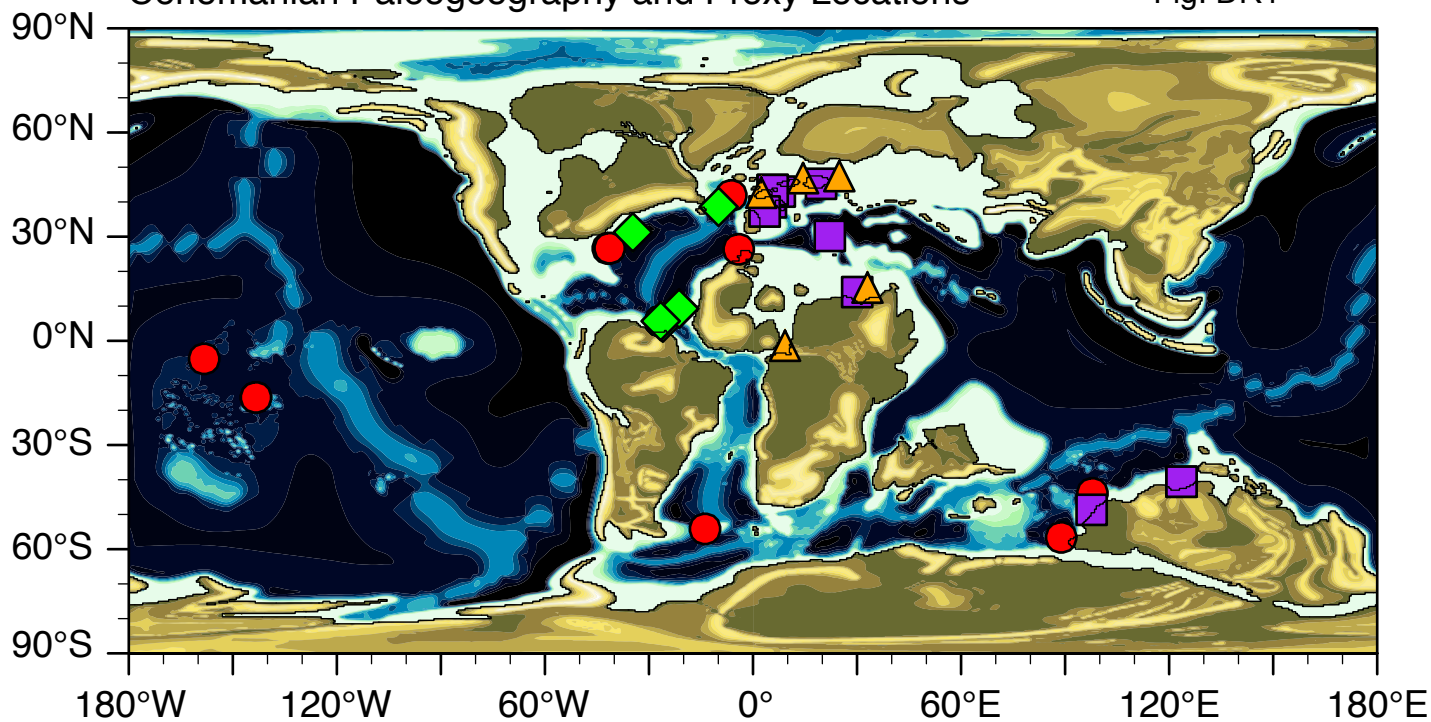

Maastrichtian Paleogeography and Proxy Locations

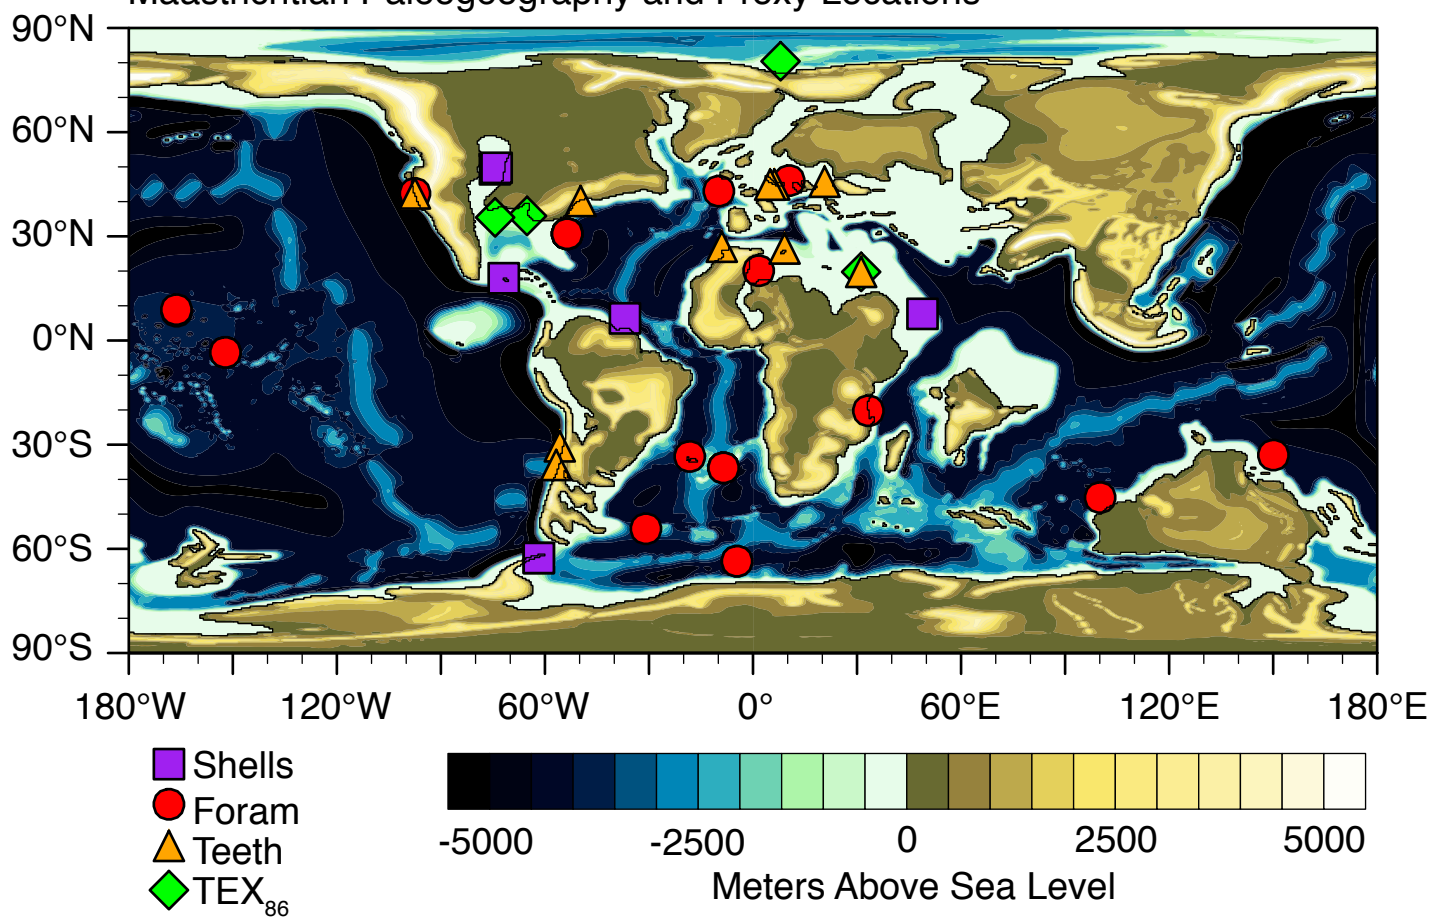

Fig. DR2

Temperature (°C)

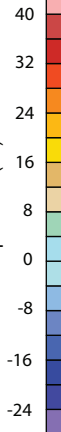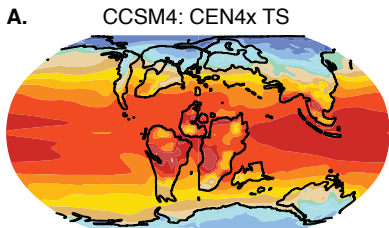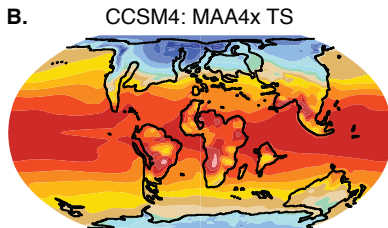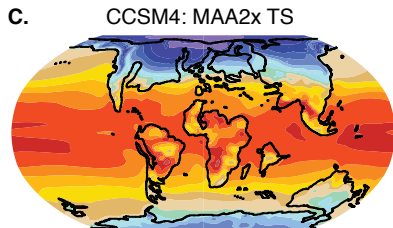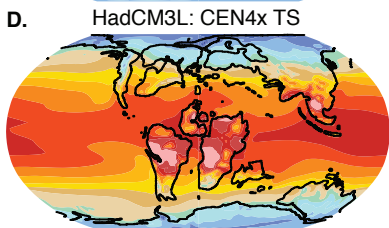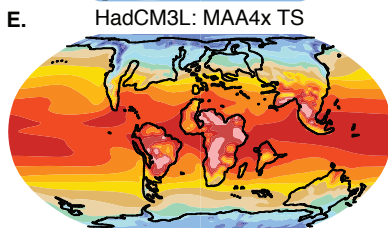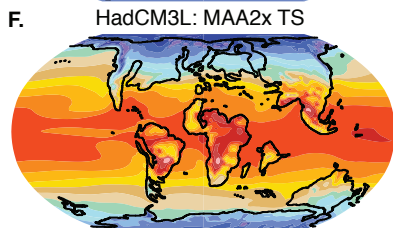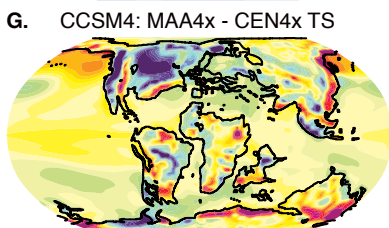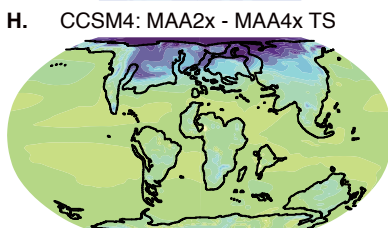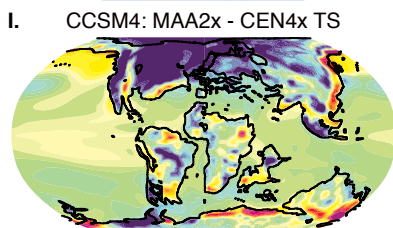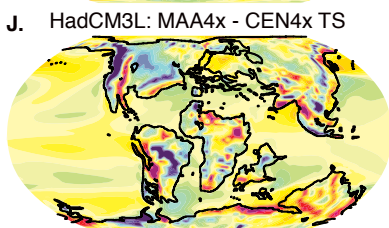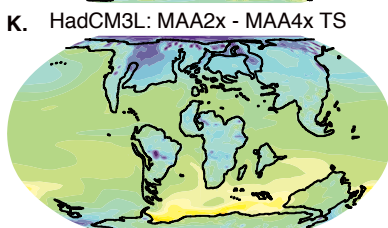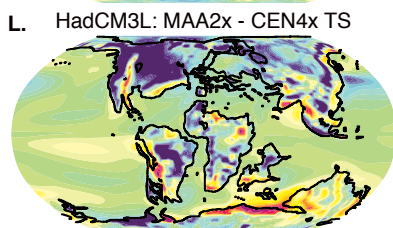

Temperature (°C)

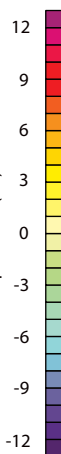



Fig. DR3

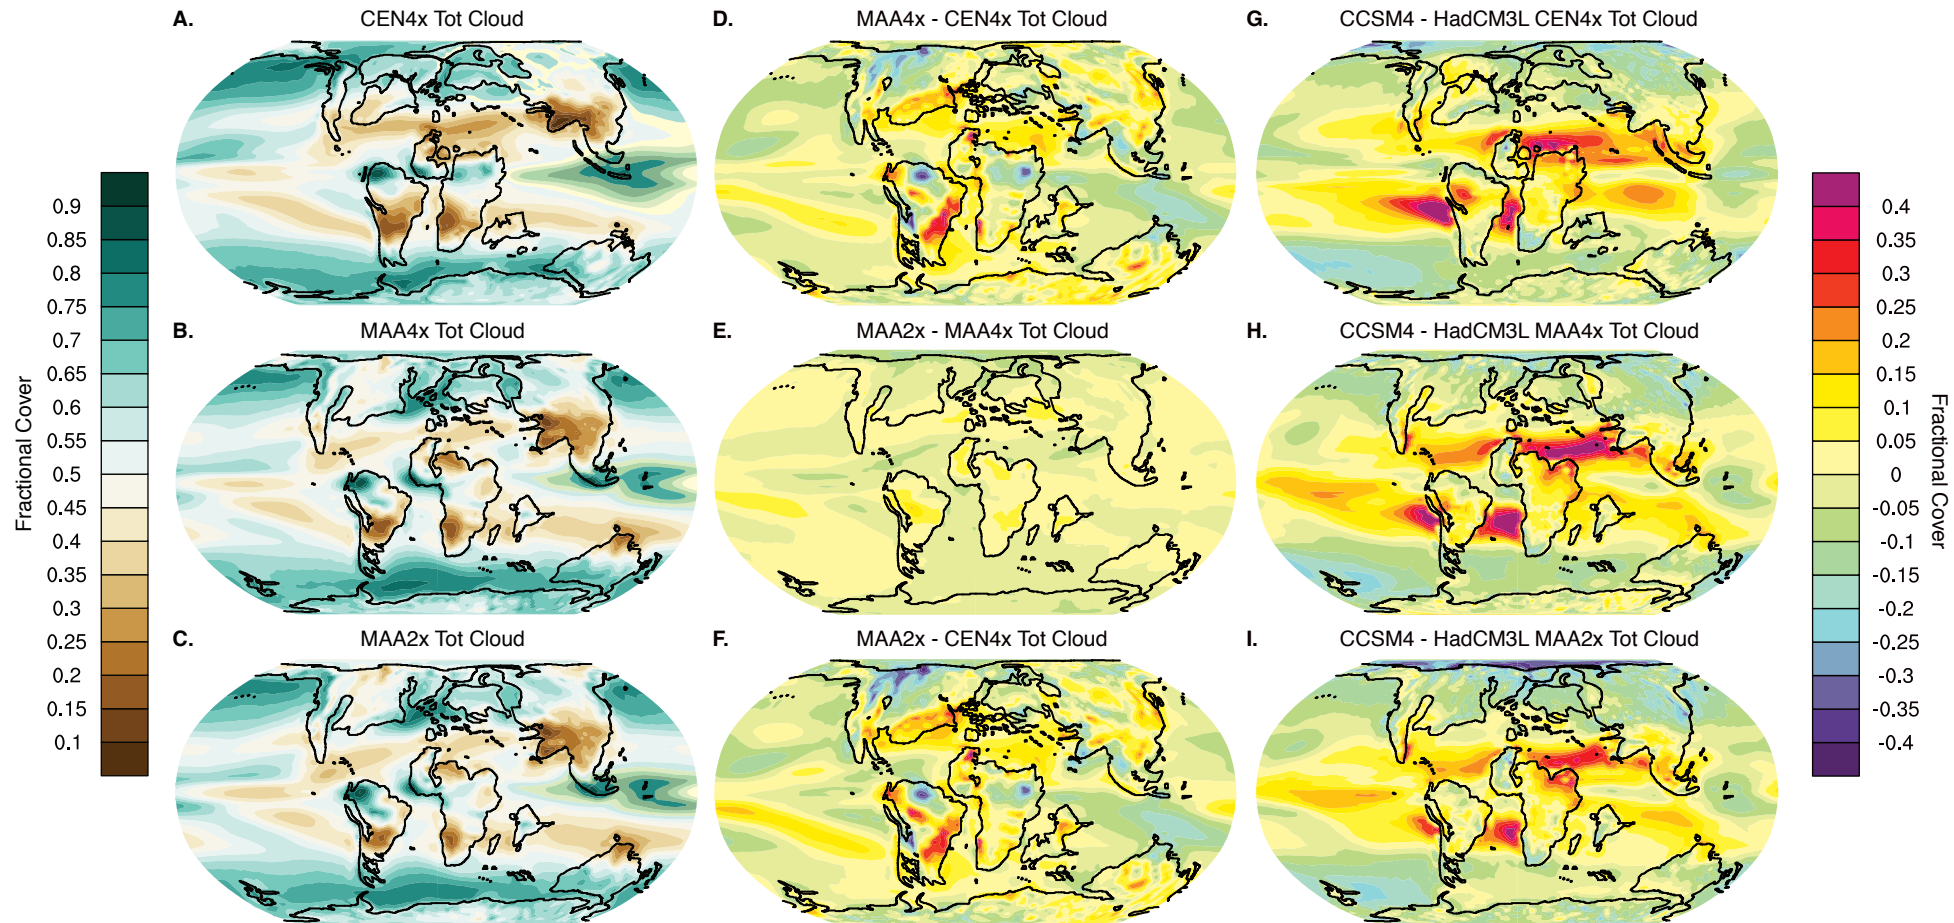



Fig. DR4

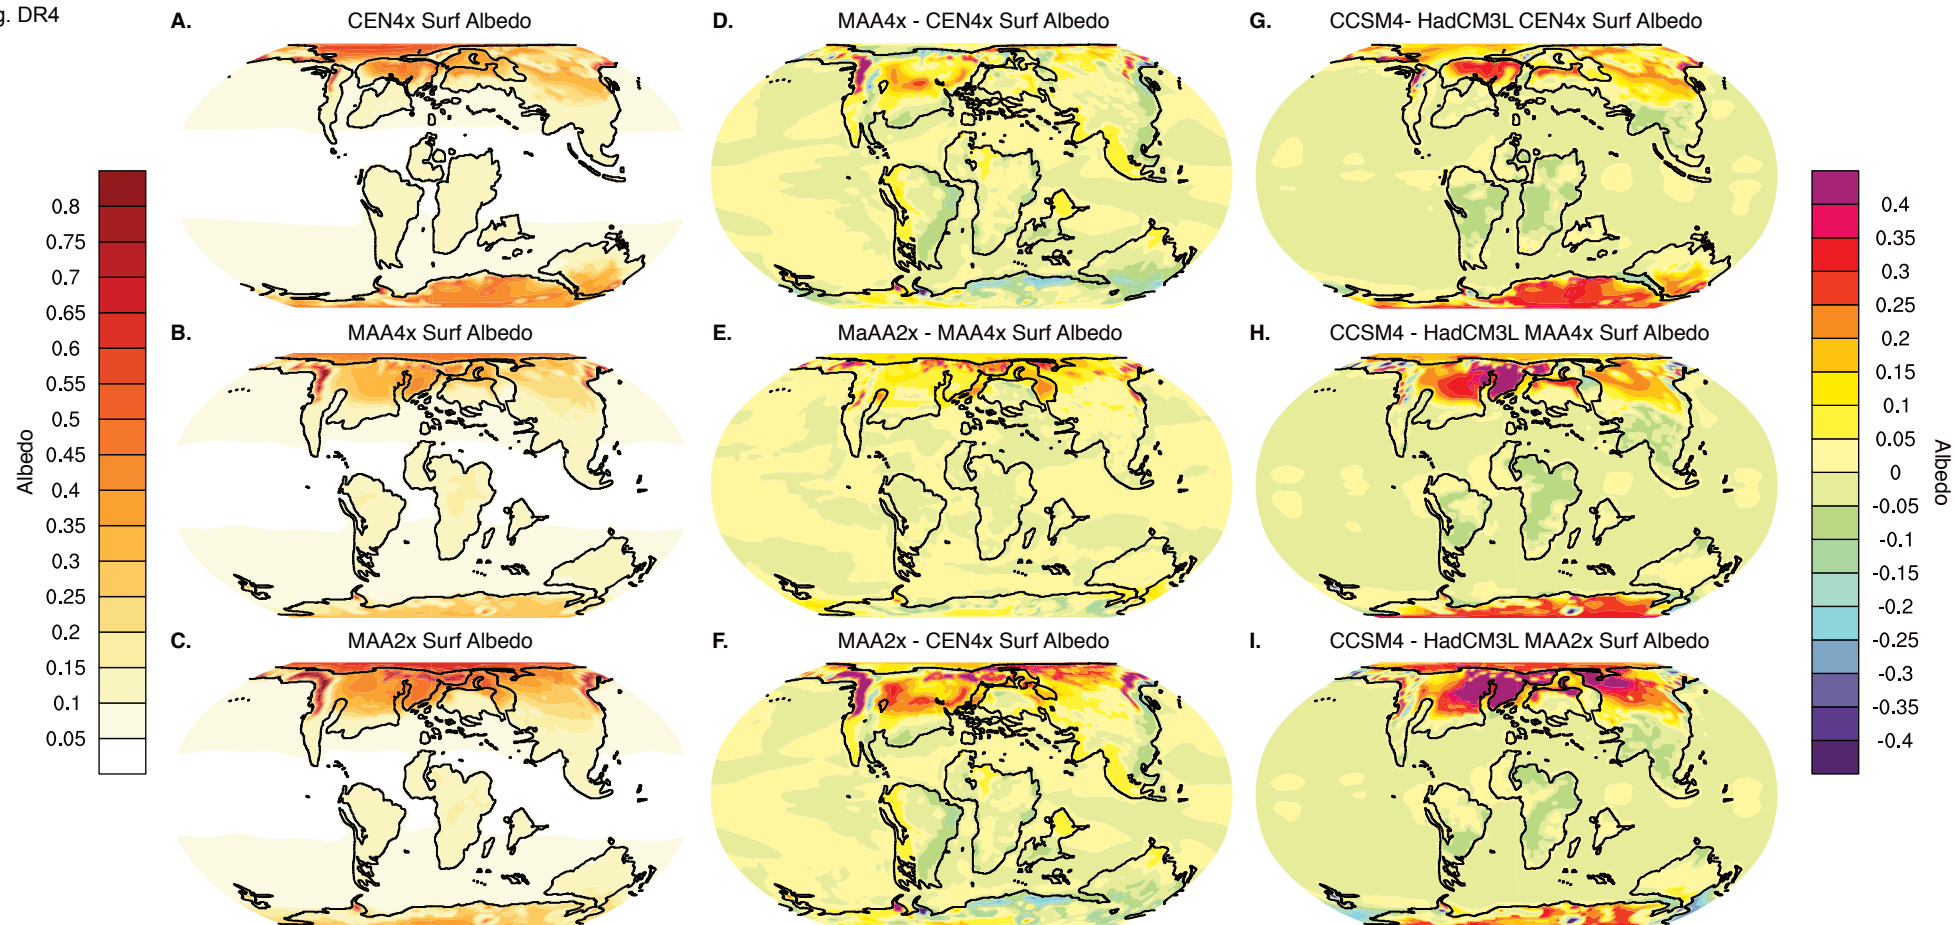

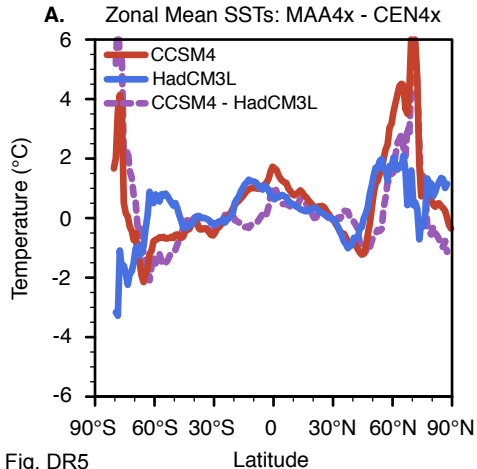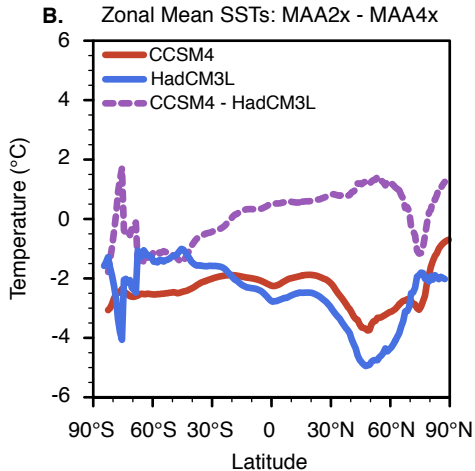

Fig. DR5

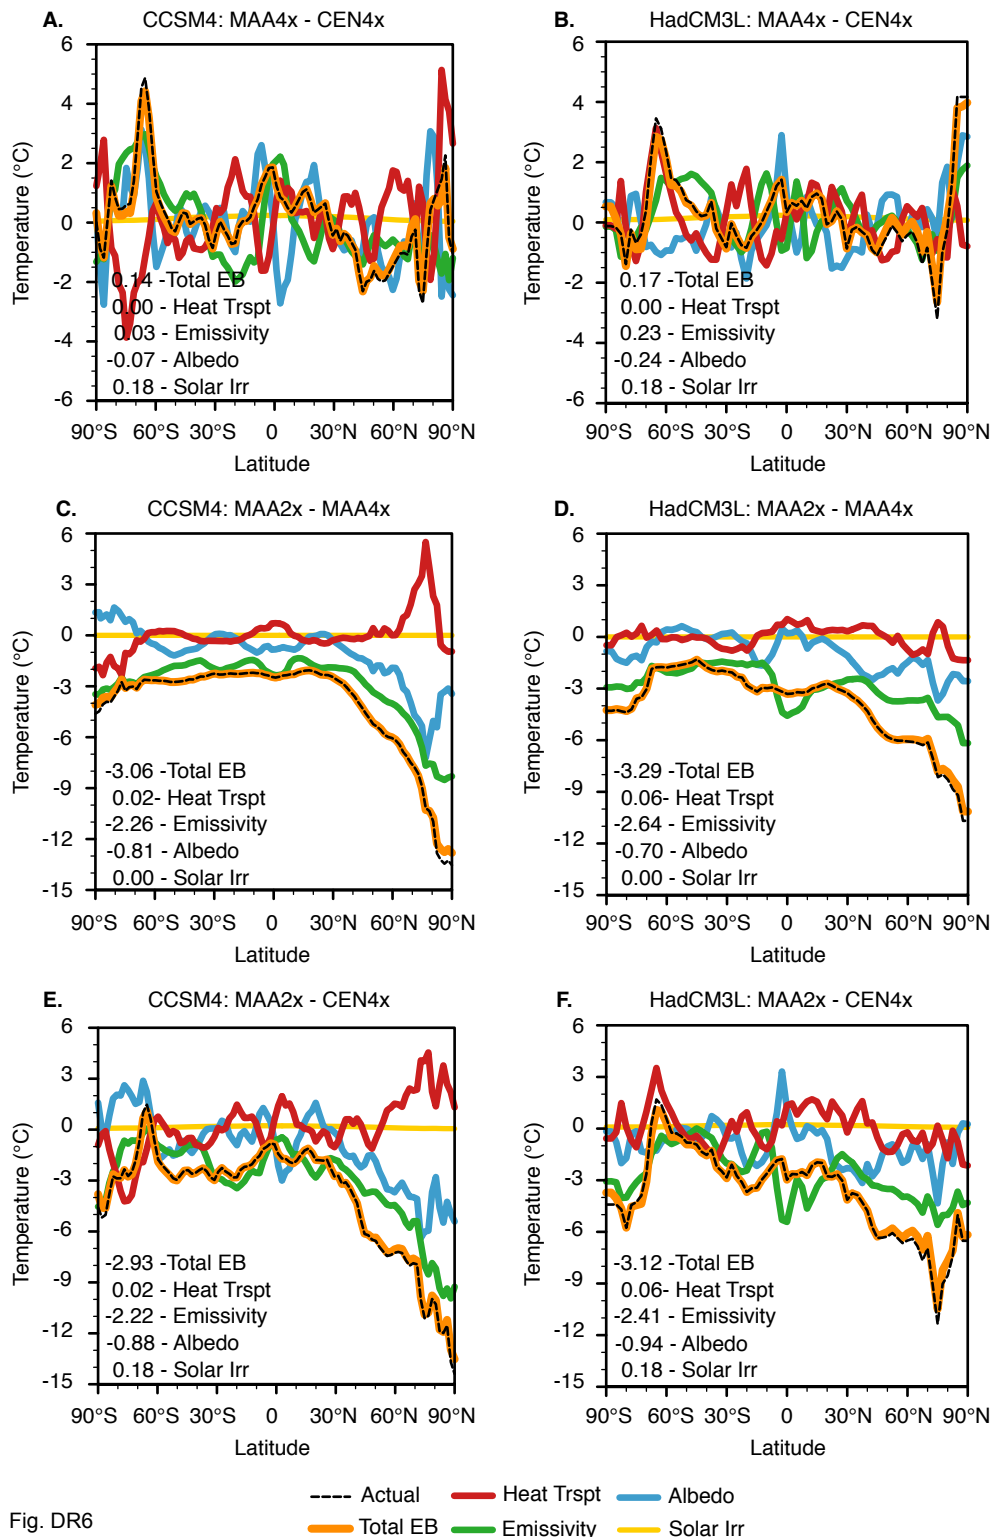

Fig. DR6

**A.** CEN4x Ann Avg Sea Ice: CCSM4 NH

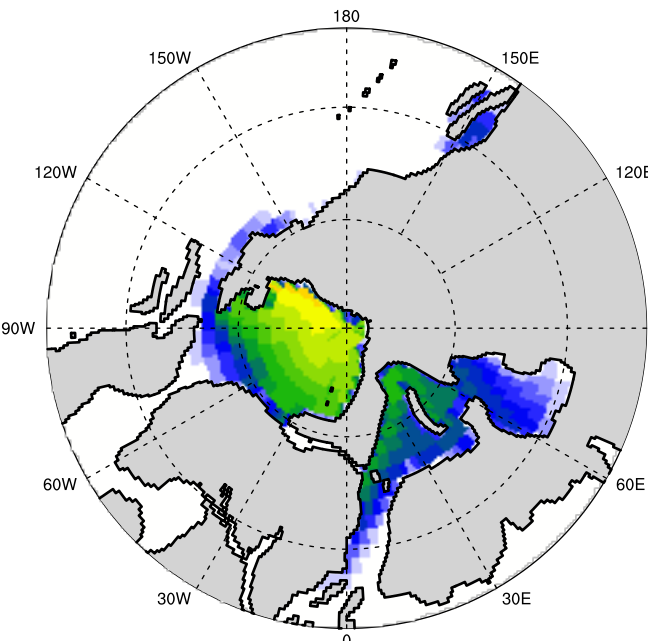

**B.** CEN4x Ann Avg Sea Ice: HadCM3L NH

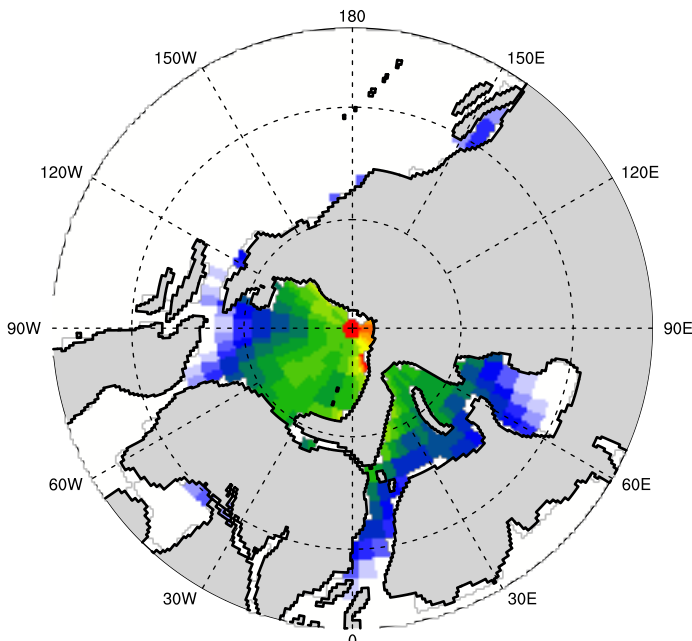

**C.** CEN4x Ann Avg Sea Ice: CCSM4 SH

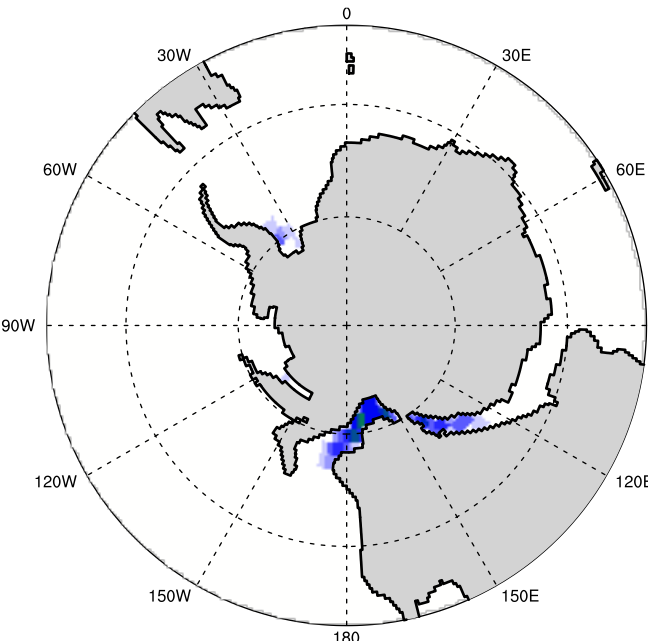

**D.** CEN4x Ann Avg Sea Ice: HadCM3L SH

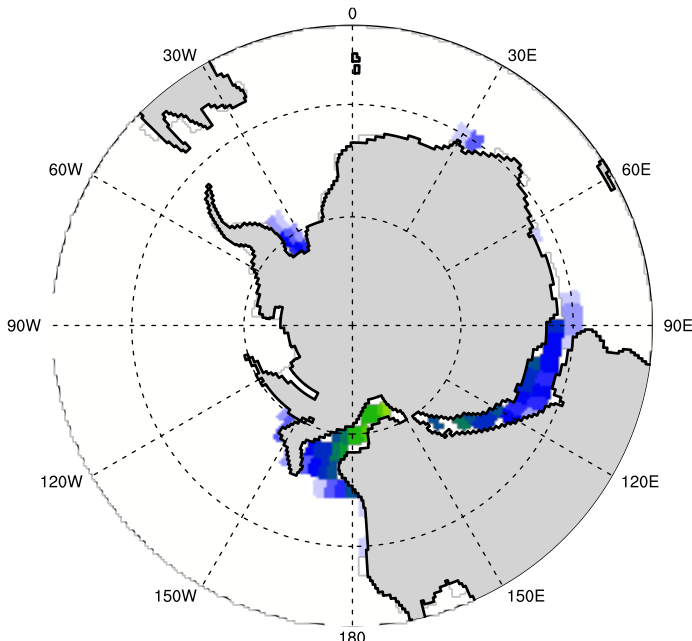

**E.** MAA4x Ann Avg Sea Ice: CCSM4 NH

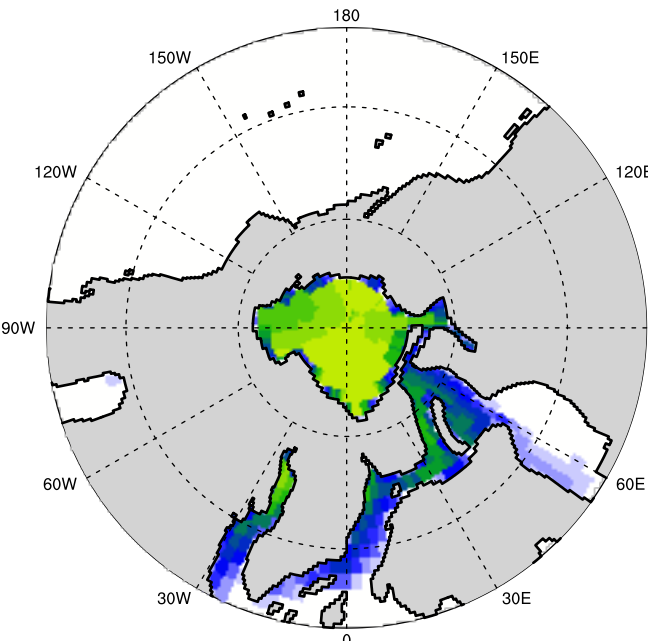

**F.** MAA4x Ann Avg Sea Ice: HadCM3L NH

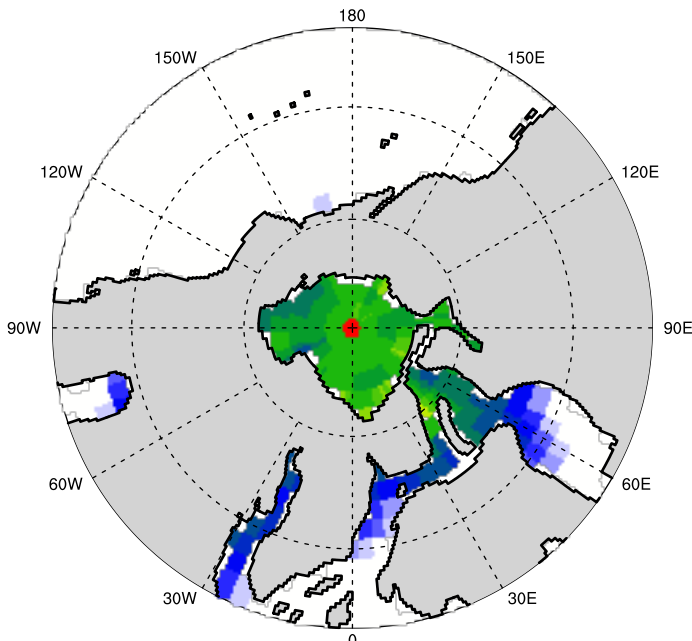

**G.** MAA4x Ann Avg Sea Ice: CCSM4 SH

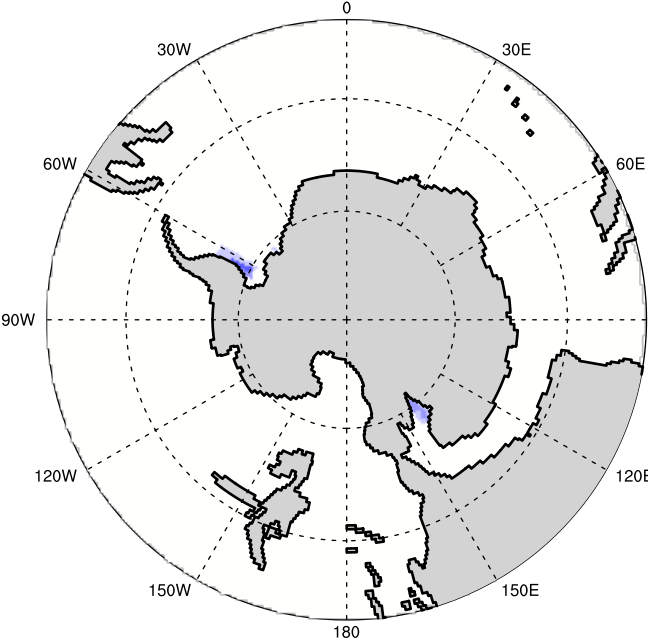

**H.** MAA4x Ann Avg Sea Ice: HadCM3L SH

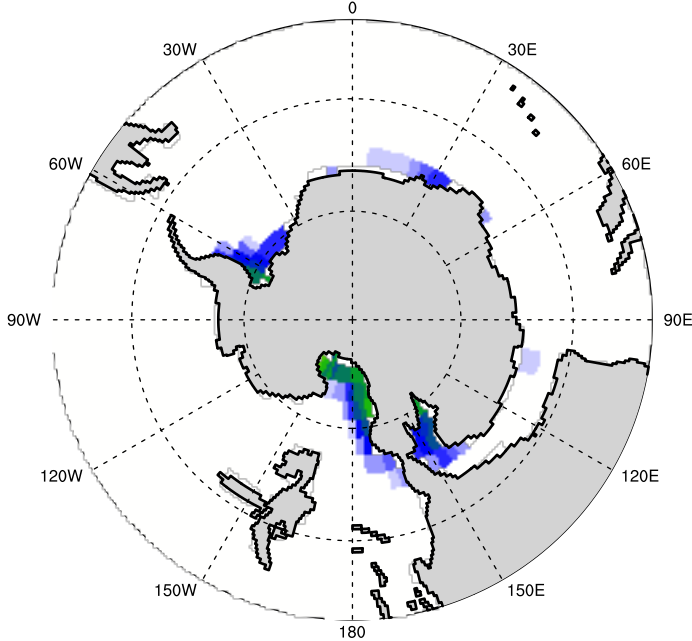

**I.** MAA2x Ann Avg Sea Ice: CCSM4 NH

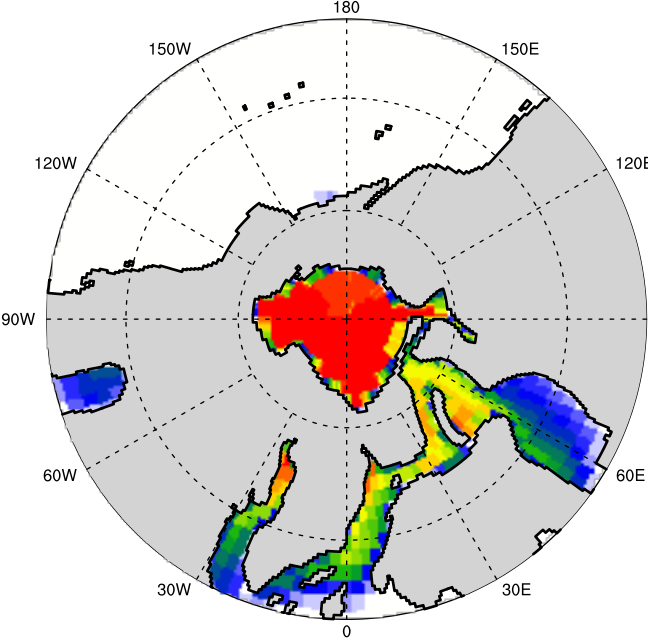

**J.** MAA2x Ann Avg Sea Ice: HadCM3L NH

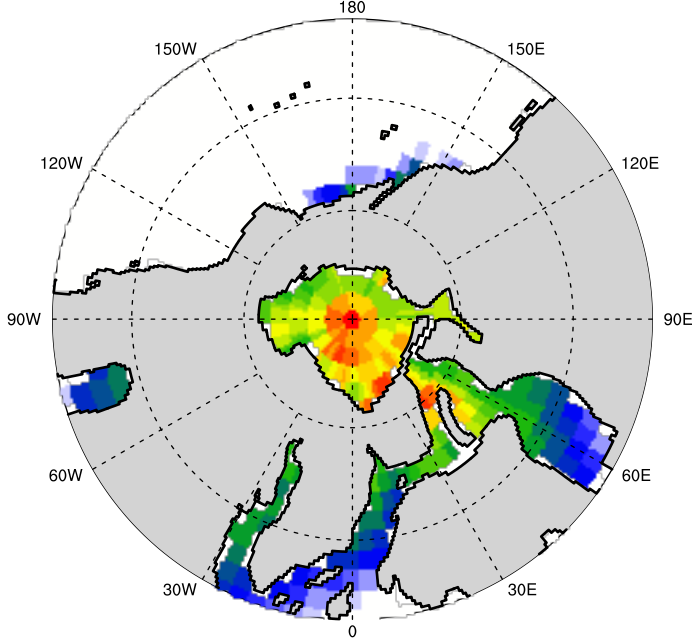

**K.** MAA2x Ann Avg Sea Ice: CCSM4 SH

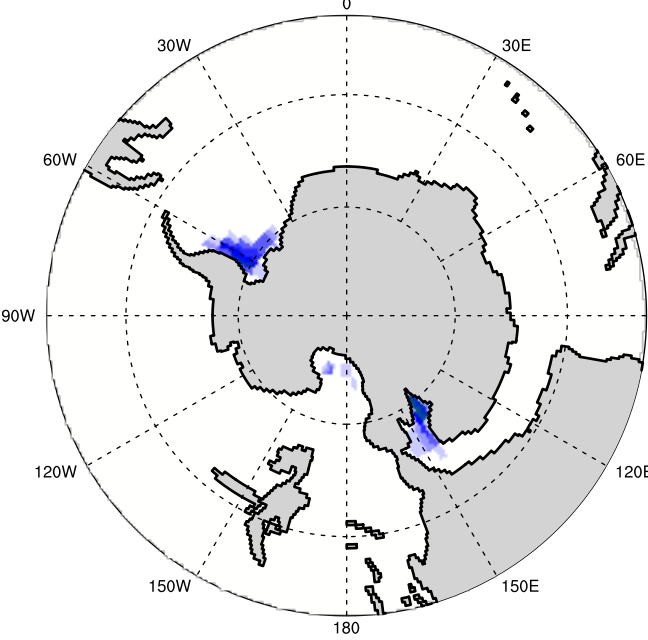

**L.** MAA2x Ann Avg Sea Ice: HadCM3L SH

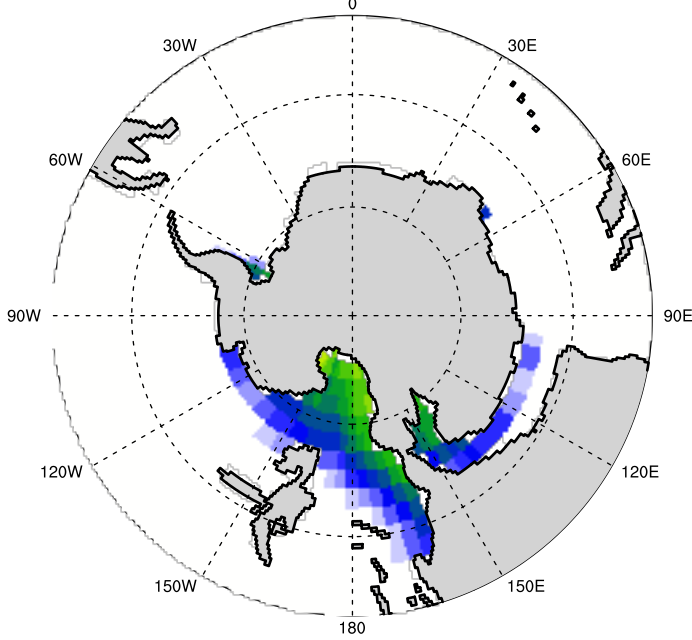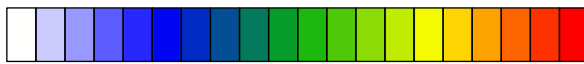

0.1 0.2 0.3 0.4 0.5 0.6 0.7 0.8 0.9

Sea Ice Fraction

**A.** Cenomanian 4x CO<sub>2</sub> Zonal SSTs: No Forams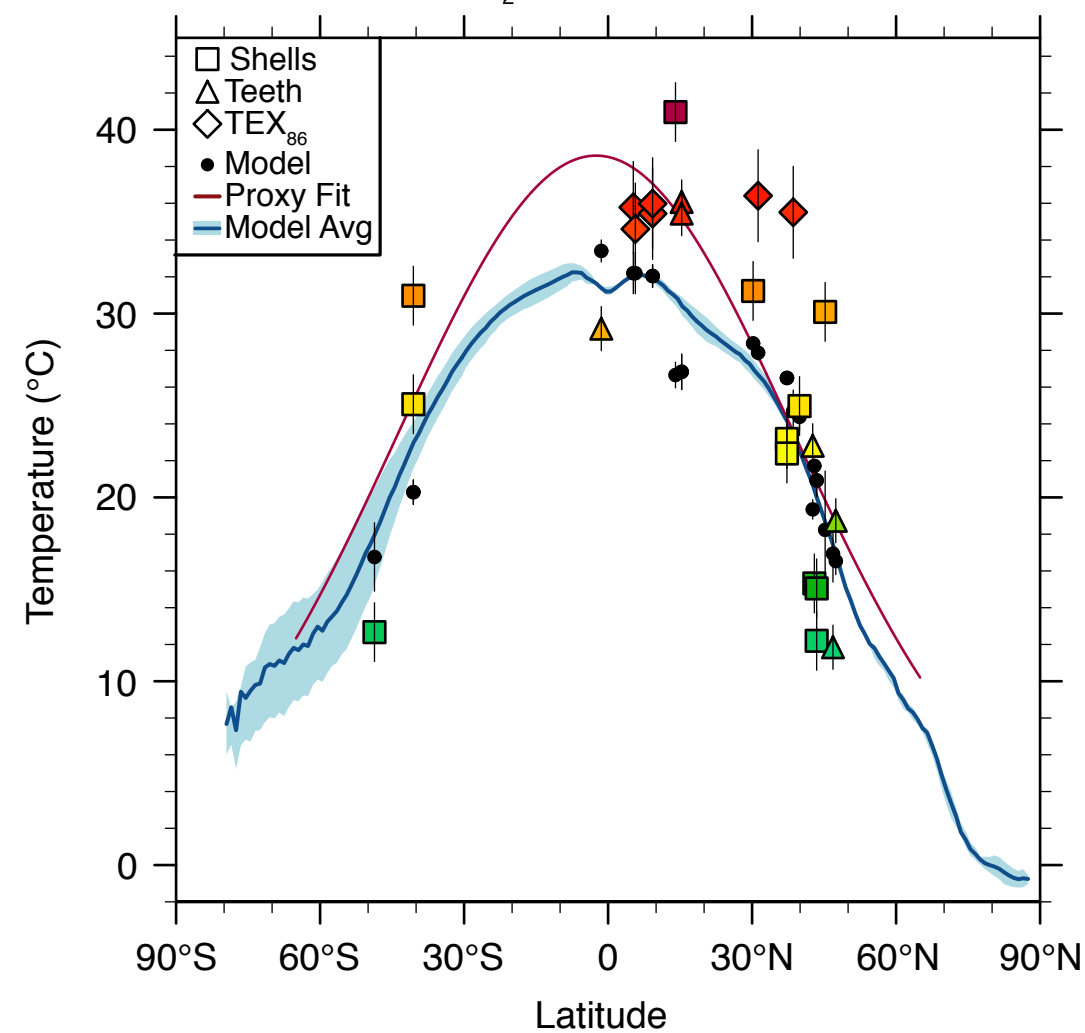**B.** Cenomanian 4x CO<sub>2</sub> Zonal SSTs: No Teeth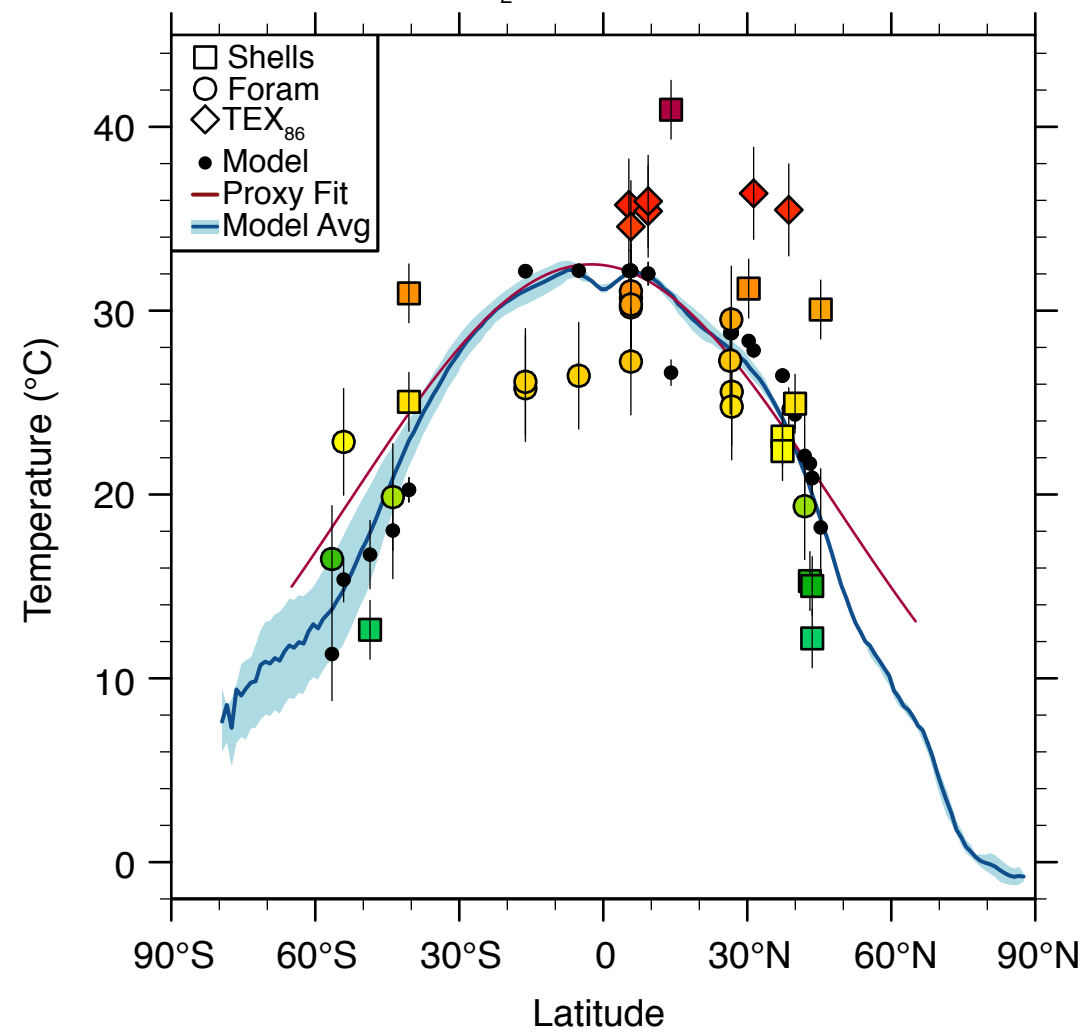**C.** Cenomanian 4x CO<sub>2</sub> Zonal SSTs: No Shells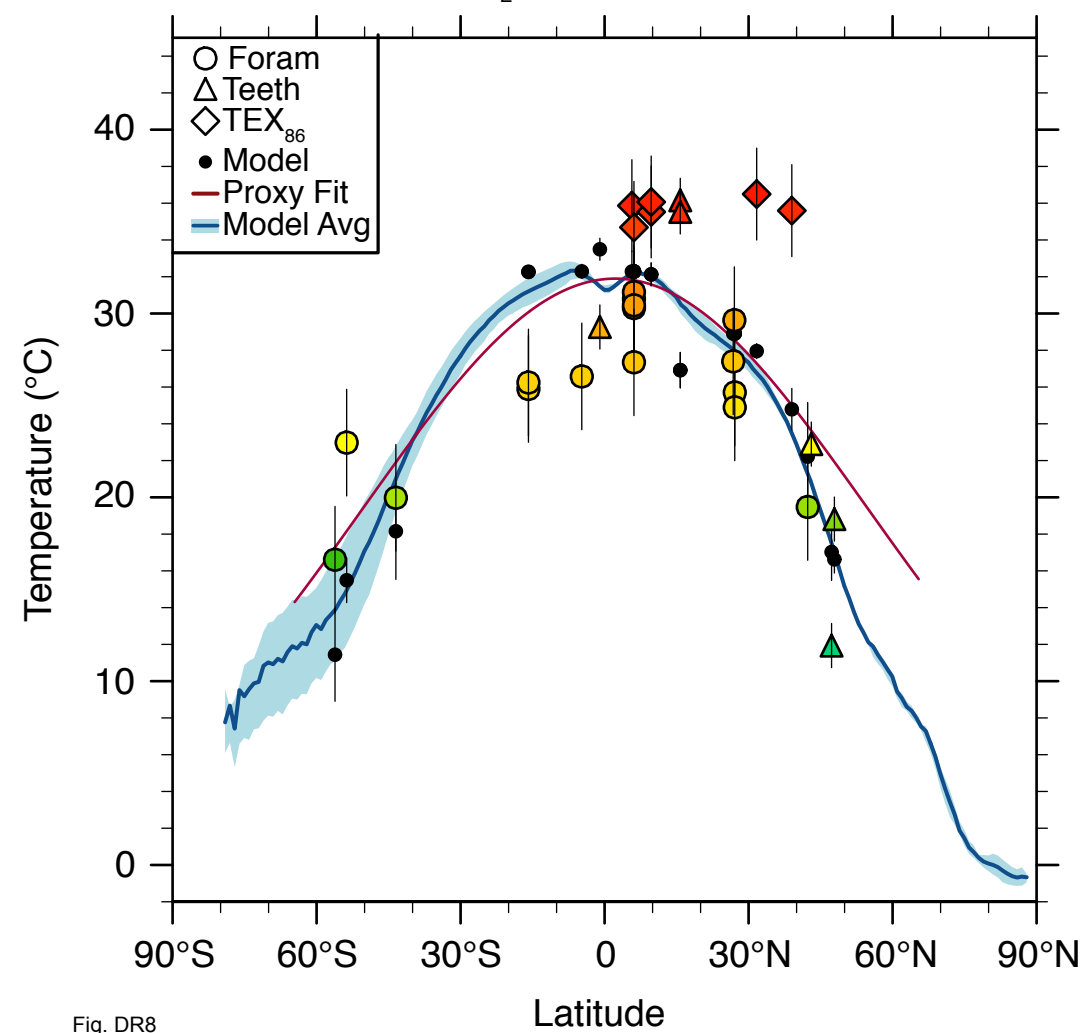**D.** Cenomanian 4x CO<sub>2</sub> Zonal SSTs: No TEX<sub>86</sub>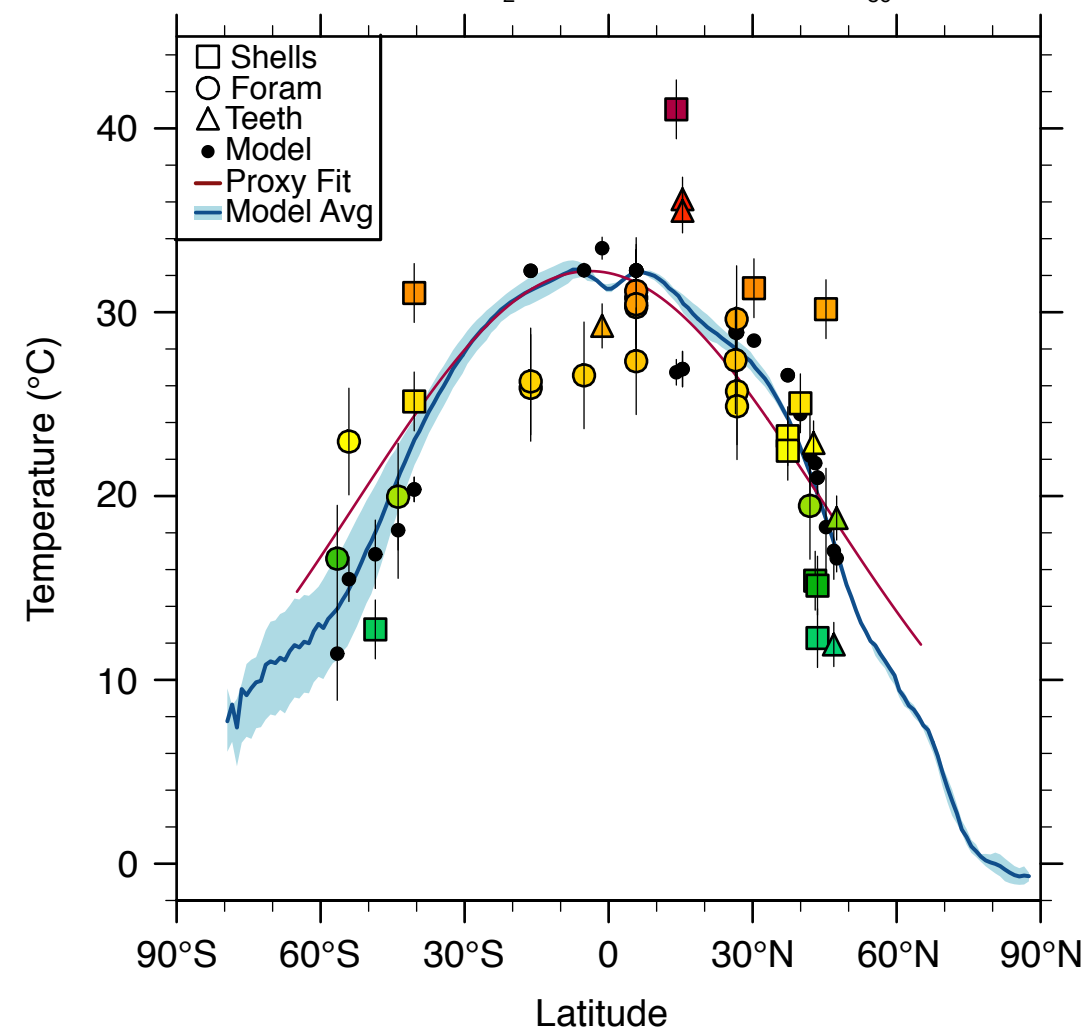



**A.** Maastrichtian 4x CO<sub>2</sub> Zonal SSTs: No Forams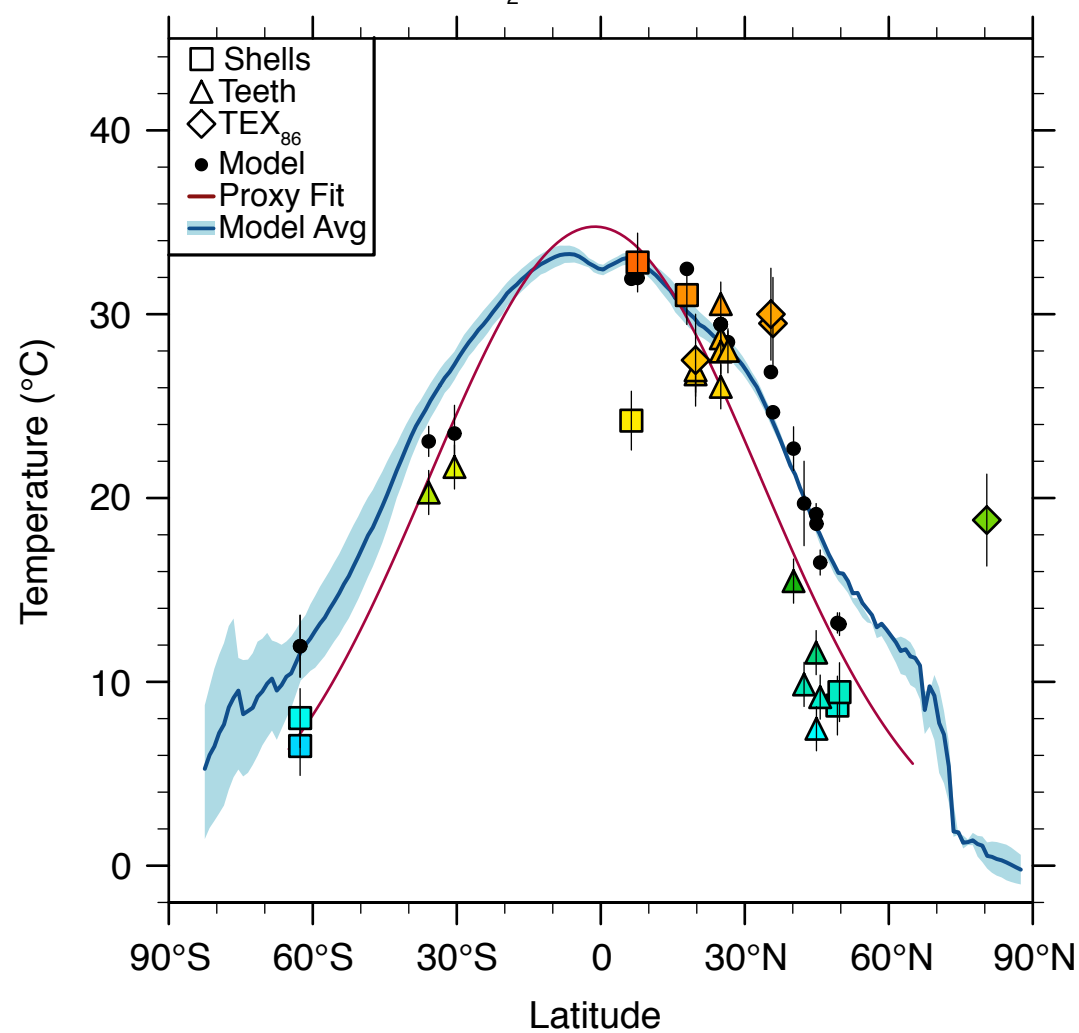**B.** Maastrichtian 4x CO<sub>2</sub> Zonal SSTs: No Teeth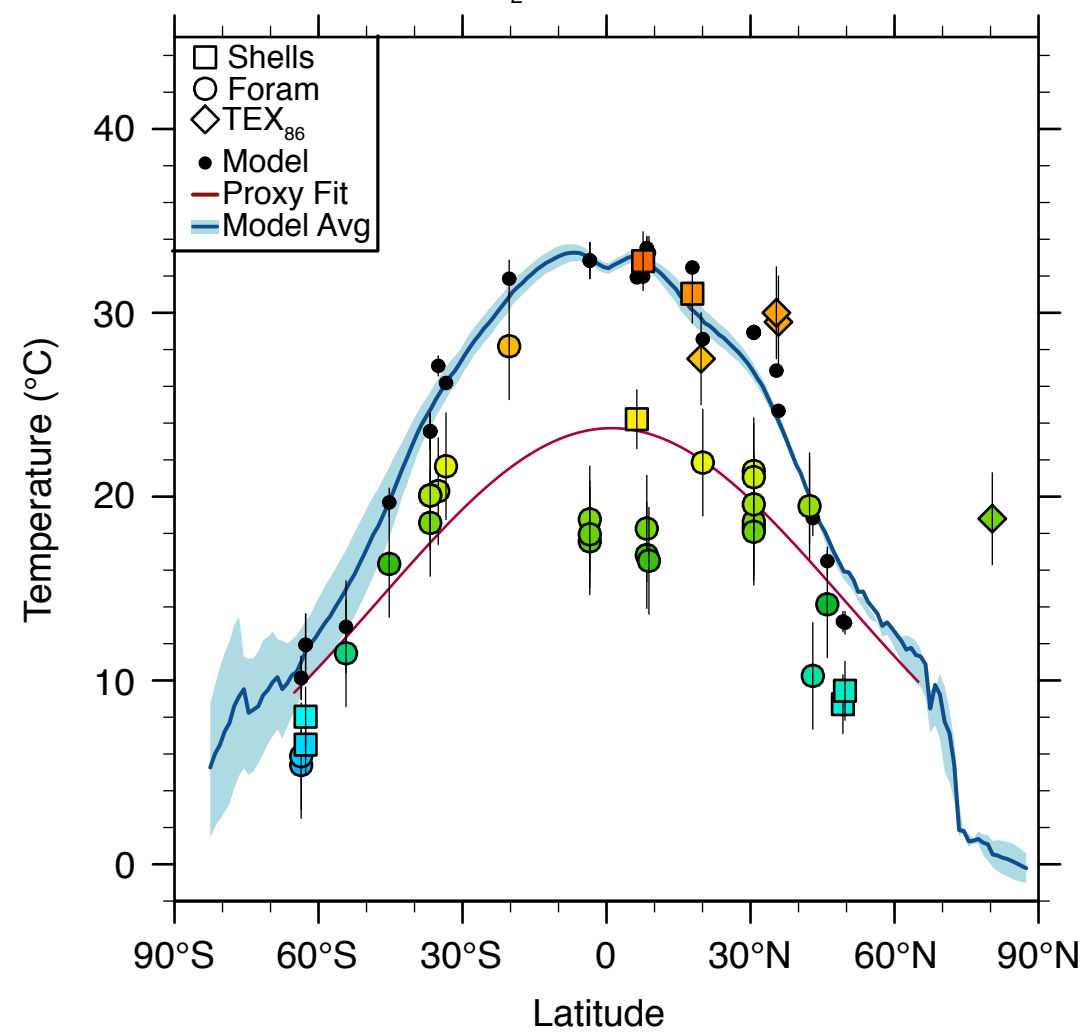**C.** Maastrichtian 4x CO<sub>2</sub> Zonal SSTs: No Shells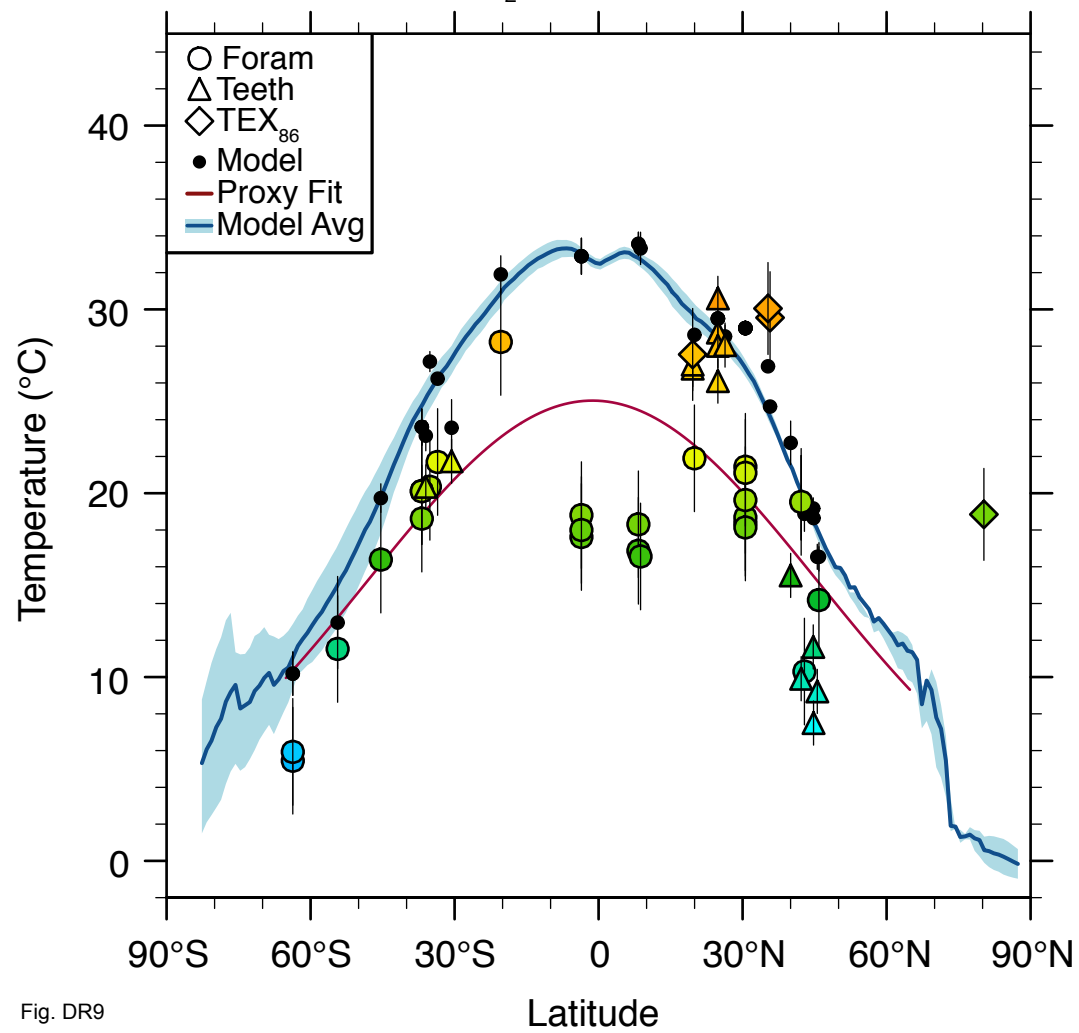**D.** Maastrichtian 4x CO<sub>2</sub> Zonal SSTs: No TEX<sub>86</sub>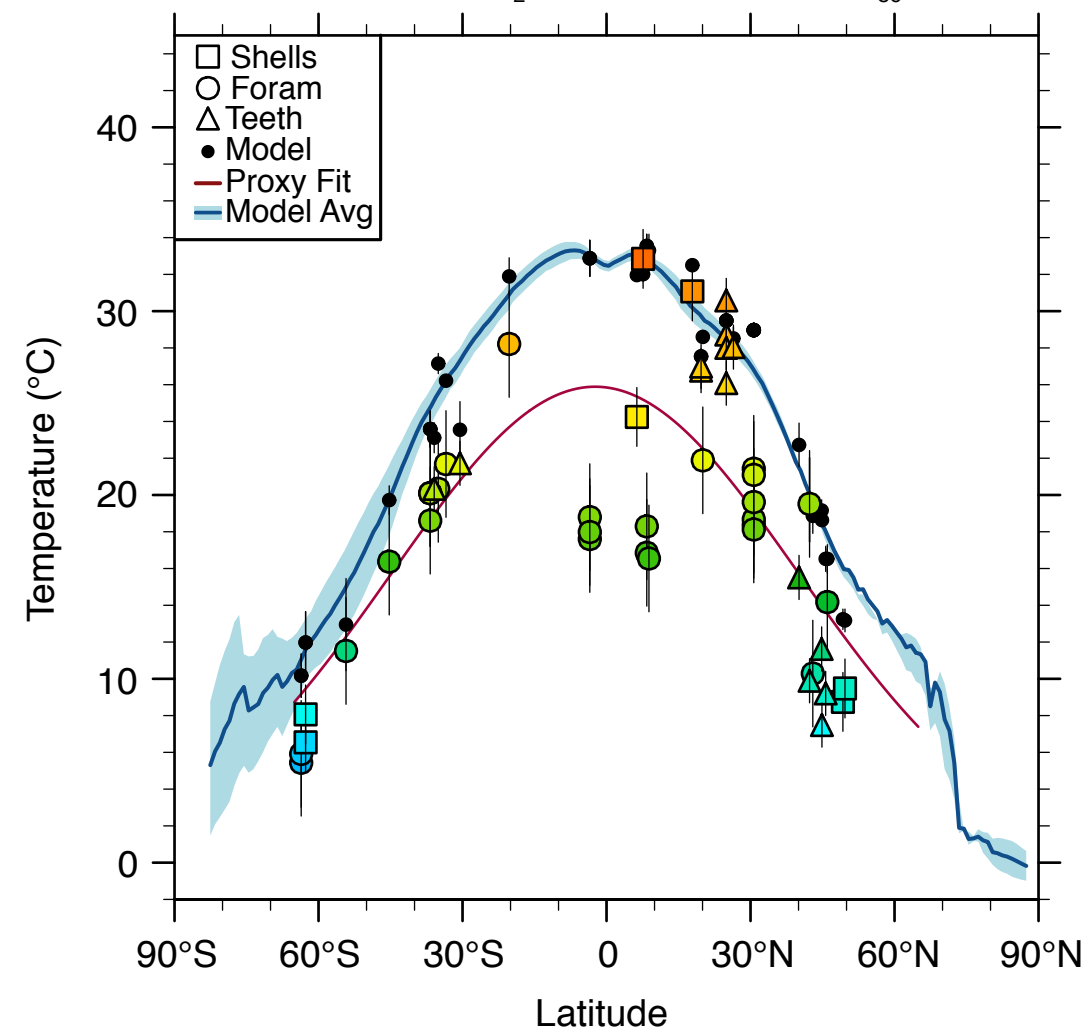

**A.** Maastrichtian 2x CO<sub>2</sub> Zonal SSTs: No Forams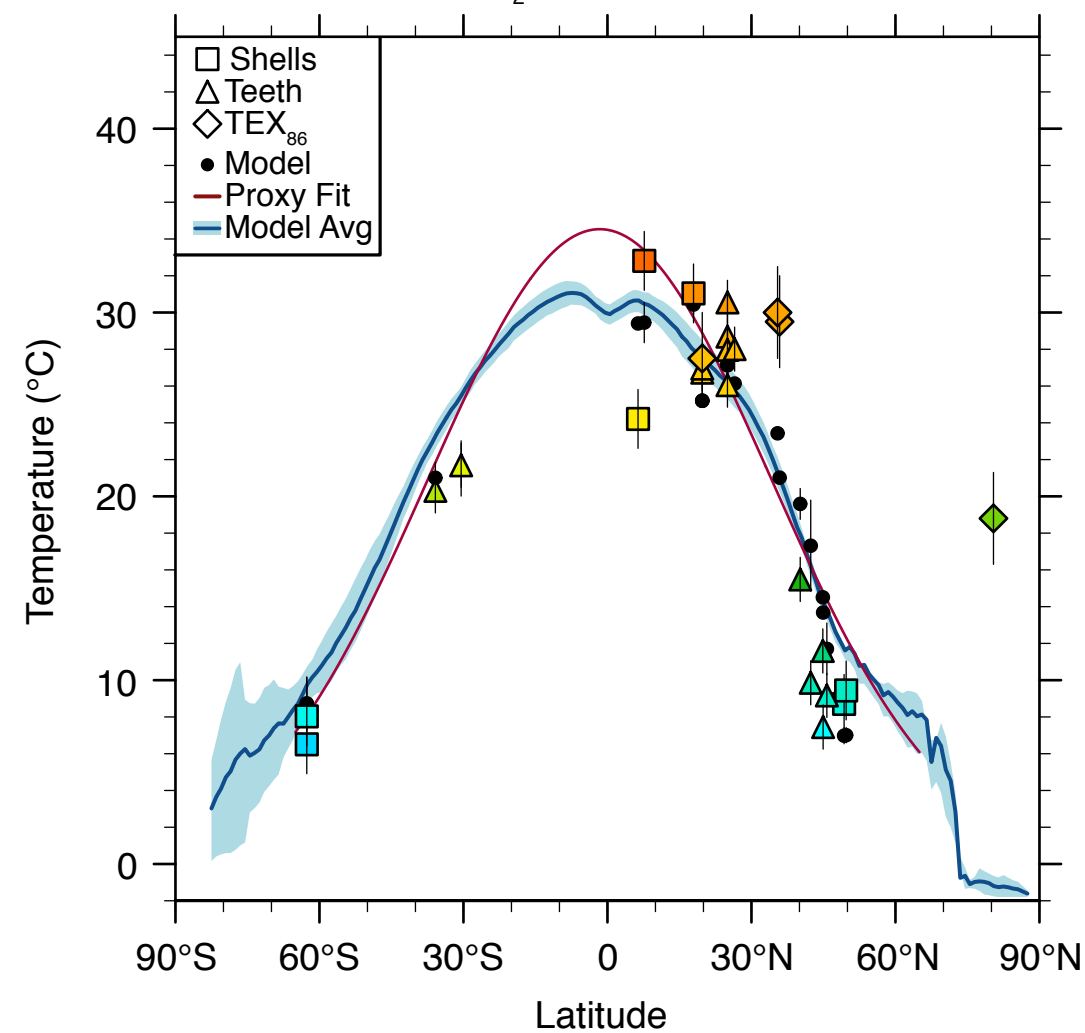**B.** Maastrichtian 2x CO<sub>2</sub> Zonal SSTs: No Teeth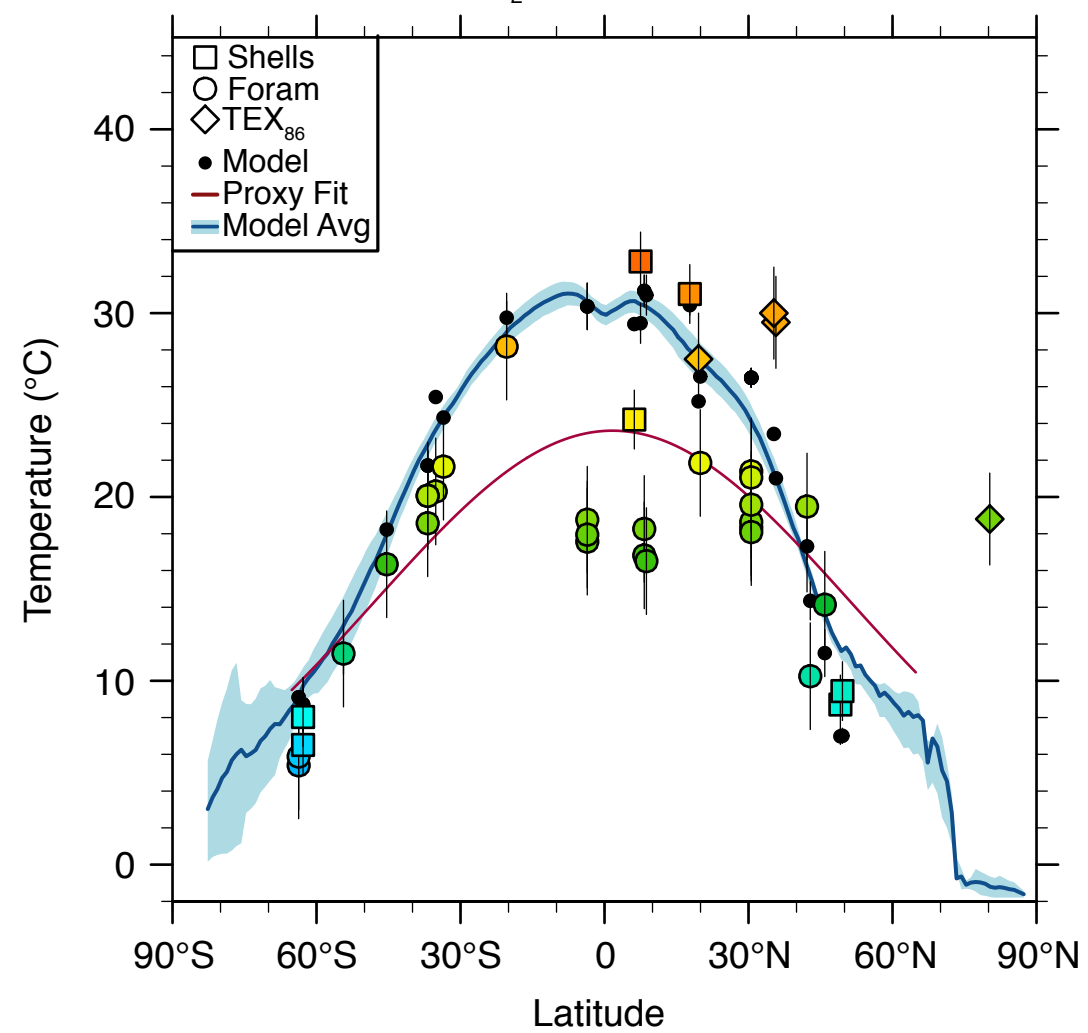**C.** Maastrichtian 2x CO<sub>2</sub> Zonal SSTs: No Shells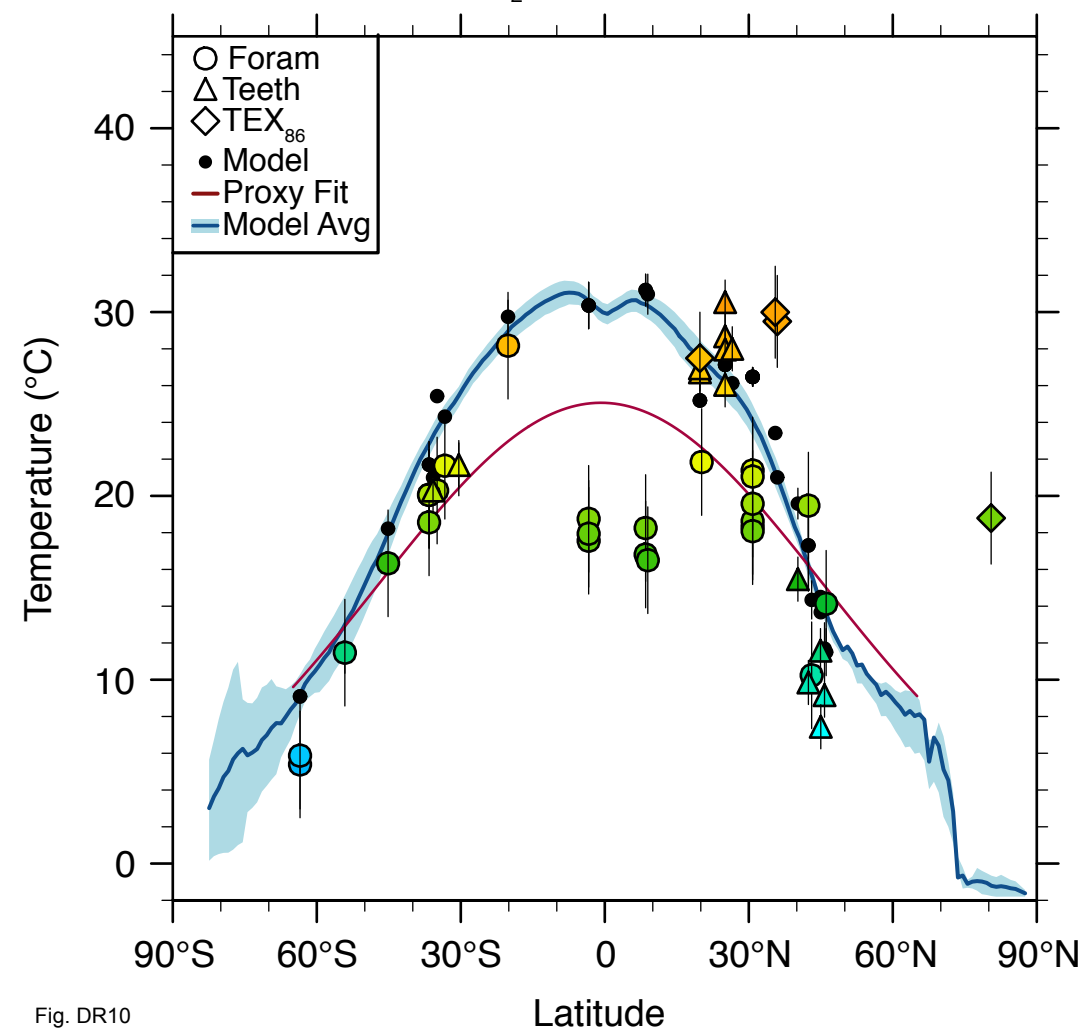**D.** Maastrichtian 2x CO<sub>2</sub> Zonal SSTs: No TEX<sub>86</sub>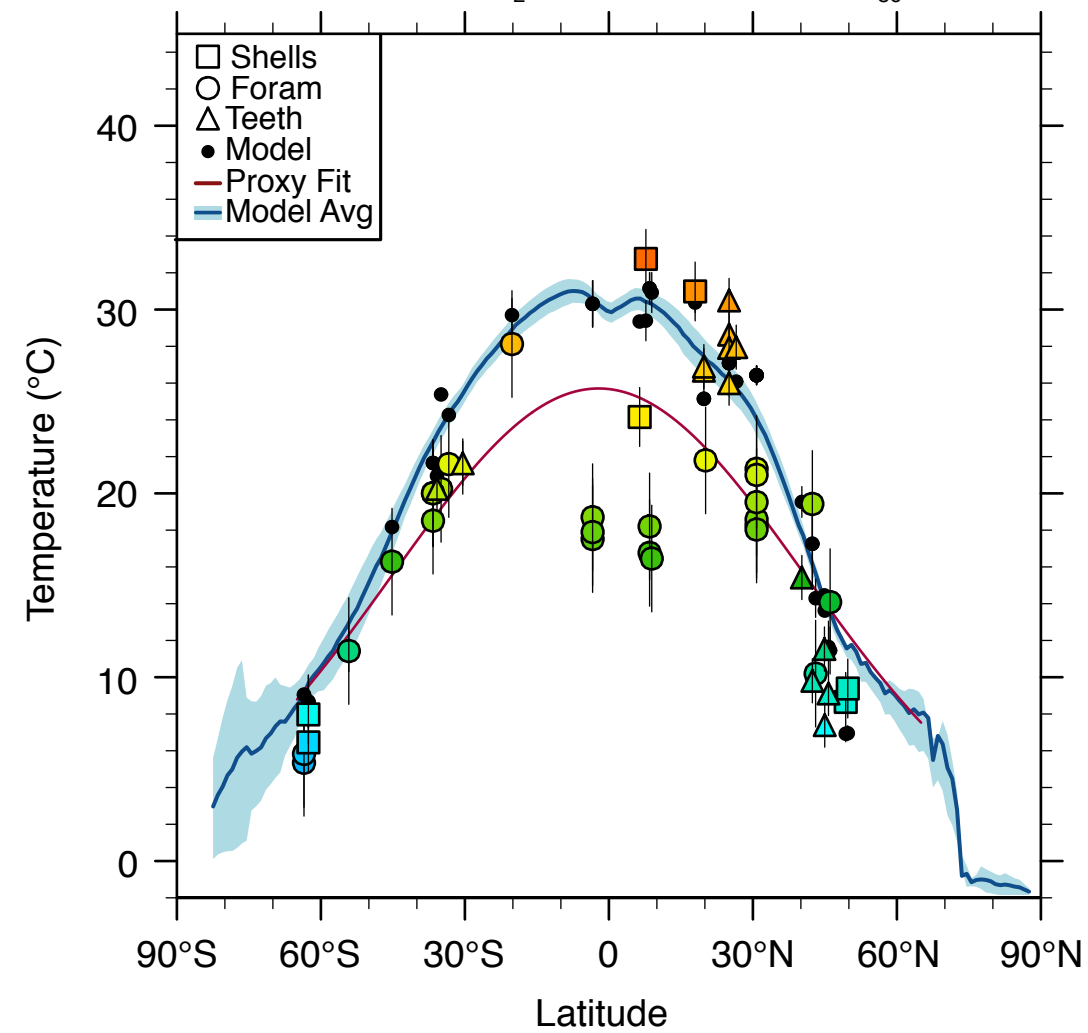

**A.** Cenomanian 4x CO<sub>2</sub> Zonal SST Differences

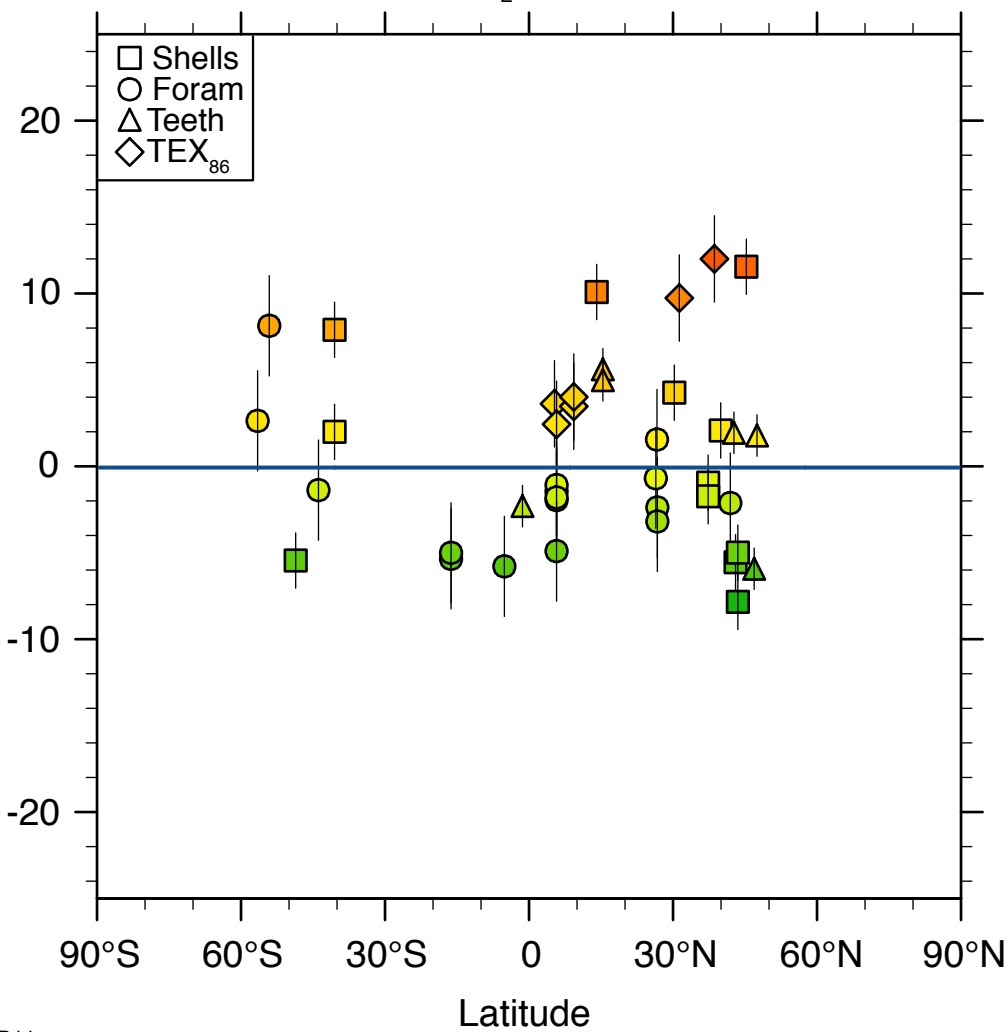

**B.** Maastrichtian 4x CO<sub>2</sub> Zonal SST Differences

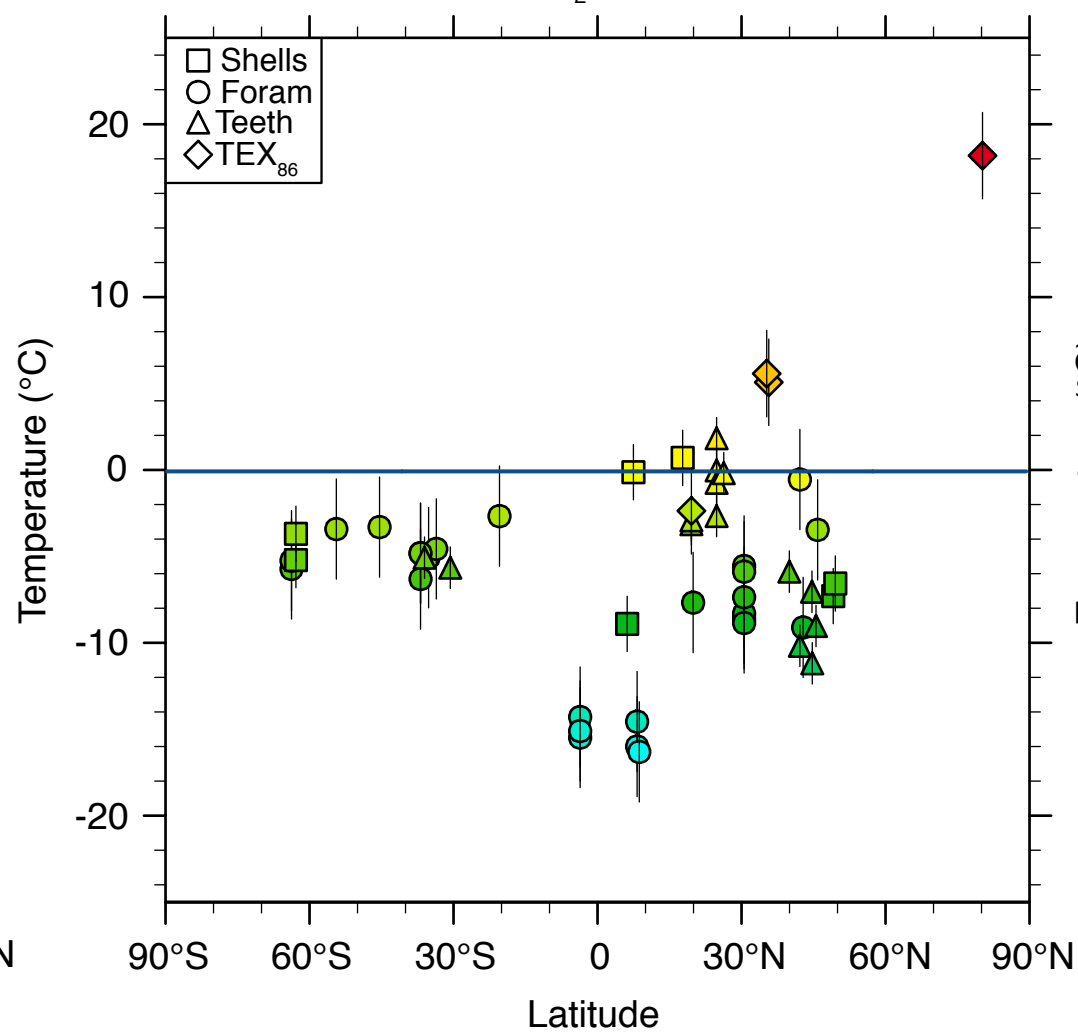

**C.** Maastrichtian 2x CO<sub>2</sub> Zonal SST Differences

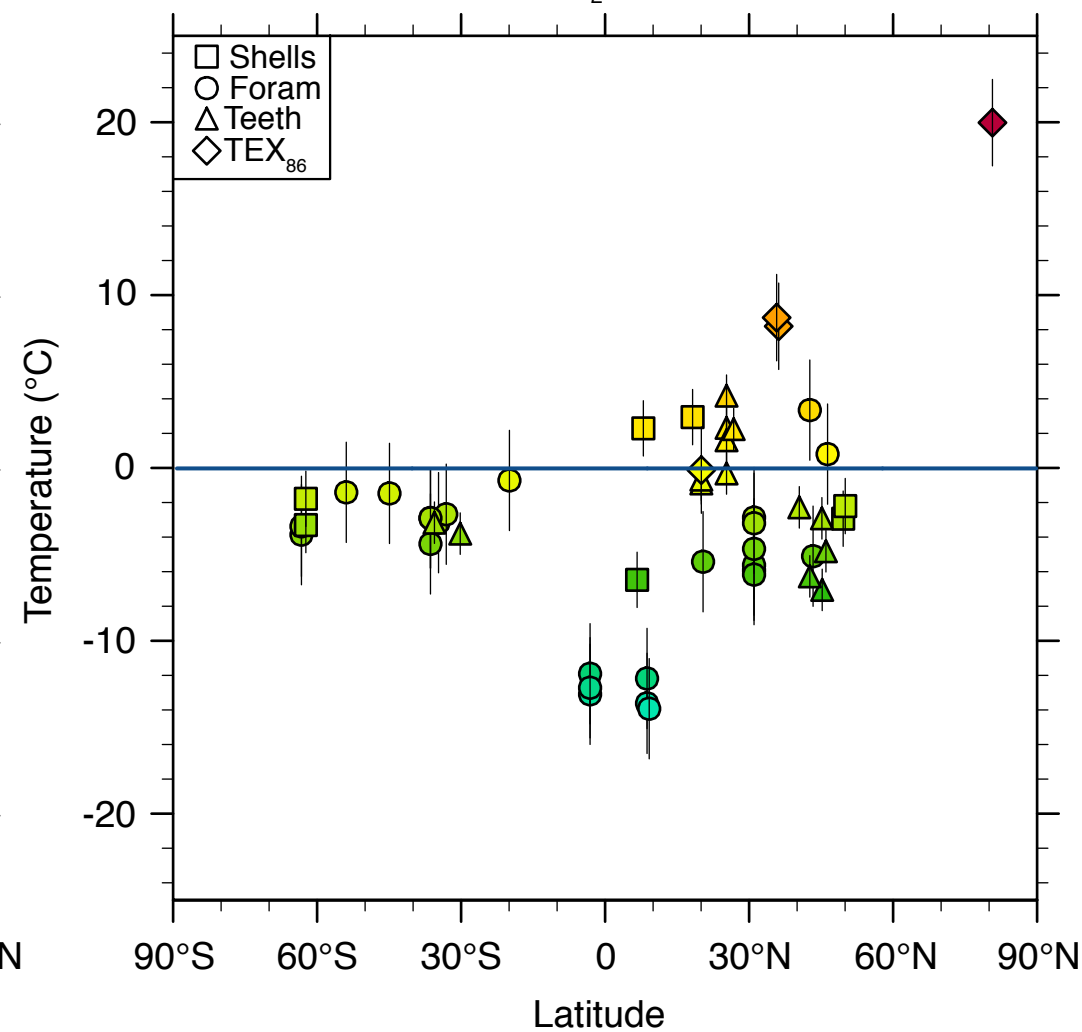



TABLE DR1: MODEL CONFIGURATION AND DATA

| Experiment     | Age<br>(Ma) | Solar Constant<br>(Wm <sup>-2</sup> ) | CO <sub>2</sub><br>(ppmv) | Global MAT<br>(°C) | EQ Temp: 5°S-5°N<br>(°C) | N Pole Temp: 85°-90°N<br>(°C) | S Pole Temp: 85°-90°S<br>(°C) | NH Gradient<br>(°C) | SH Gradient<br>(°C) |
|----------------|-------------|---------------------------------------|---------------------------|--------------------|--------------------------|-------------------------------|-------------------------------|---------------------|---------------------|
| Cen4x: CESM    | 96.4        | 1353.9                                | 1120                      | 22.80093           | 30.75579                 | -10.93816                     | -4.673659                     | 41.69395            | 35.429449           |
| Cen4x: HadCM3L | 96.4        | 1353.9                                | 1120                      | 22.17896           | 31.68976                 | -12.16977                     | -7.613354                     | 43.85953            | 39.303114           |
| Maa4x: CESM    | 68.2        | 1357.18                               | 1120                      | 22.92284           | 31.92628                 | -9.934456                     | -5.359563                     | 41.860736           | 37.285843           |
| Maa4x: HadCM3L | 68.2        | 1357.18                               | 1120                      | 22.33742           | 32.52404                 | -8.000755                     | -7.752418                     | 40.524795           | 40.276458           |
| Maa2x: CESM    | 68.2        | 1357.18                               | 560                       | 19.81563           | 29.51464                 | -23.30825                     | -9.552328                     | 52.82289            | 39.066968           |
| Maa2x: HadCM3L | 68.2        | 1357.18                               | 560                       | 19.02272           | 29.29172                 | -18.09064                     | -12.0258                      | 47.38236            | 41.31752            |

*Note:* All reported temperatures are mean annual surface temperatures.

TABLE DR2: ALL MAASTRICHTIAN AND CENOMANIAN SST DATA
